## 1 **Cyclin B2 is required for progression through meiosis in mouse oocytes**

2 Enrico Maria Daldello<sup>1,2,3</sup>, Xuan G. Luong<sup>1,2,3</sup>, Cai-Rong Yang<sup>1,2,3</sup>, Jonathan Kuhn<sup>4</sup> and  
3 Marco Conti<sup>1,2,3</sup>

4 <sup>1</sup> Center for Reproductive Sciences, University of California, San Francisco, CA 94143,  
5 USA

6 <sup>2</sup> USA Eli and Edythe Broad Center of Regeneration Medicine and Stem Cell Research,  
7 University of California, San Francisco, CA 94143, USA

8 <sup>3</sup> Department of Obstetrics and Gynecology and Reproductive Sciences, University of  
9 California, San Francisco, CA 94143, USA.

10 <sup>4</sup> Cell and Tissue Biology Department, University of California, San Francisco, CA 94143,  
11 USA

12

13

### 14 **ABSTRACT**

15 Cyclins associate with CDK1 to generate the M-phase-promoting factor (MPF)  
16 essential for progression through mitosis and meiosis. Previous studies concluded that  
17 CCNB2 is dispensable for cell cycle progression. Given our findings of high translation  
18 rates of *CcnB2* mRNA in prophase-arrested oocytes, we have reevaluated its role during  
19 meiosis. *CcnB2*<sup>-/-</sup> oocytes undergo delayed germinal vesicle breakdown followed by a  
20 defective M-phase due to reduced pre-MPF activity. This disrupted maturation is  
21 associated with compromised *CcnB1* and *Mos* mRNA translation and delayed spindle  
22 assembly. Given these defects, a significant population of oocytes fail to complete  
23 meiosis I because SAC remains activated and APC function is inhibited. *In vivo*, CCNB2  
24 depletion leads to decreased oocyte developmental competence, compromised  
25 fecundity, and premature ovarian failure. These findings demonstrate that CCNB2 is  
26 required to assemble sufficient pre-MPF for timely meiosis reentry and progression.  
27 Although endogenous cyclins cannot compensate, overexpression of CCNB1 rescues the  
28 meiotic phenotypes, demonstrating similar molecular properties but divergent modes of  
29 regulation of these cyclins.

## 30 INTRODUCTION

31 Successful completion of the two meiotic cell divisions is essential for gamete  
32 development and fertility. Fully-grown oocyte reentry into meiosis requires assembly of  
33 the M-phase-promoting factor (MPF) and activation of its kinase activity (Adhikari and Liu,  
34 2014). This complex subsequently phosphorylates a large number of protein substrates  
35 triggering dissolution of the nuclear membrane, chromosome condensation, and spindle  
36 assembly (Morgan, 2007). Once proper chromosome-to-microtubule attachment is  
37 achieved, rapid inactivation of MPF is necessary for the transition to anaphase. This  
38 inactivation depends on the switch-like activation of anaphase-promoting  
39 complex/cyclosome (APC/C), followed by ubiquitination and degradation of cyclins and,  
40 therefore, inactivation of MPF (Thornton and Toczyski, 2006; Yang and Ferrell, 2013).  
41 Concomitant degradation of securin leads to activation of separase, which cleaves  
42 cohesins, allowing separation of the bivalents in anaphase (Lane et al., 2012). Given the  
43 asymmetrical position of the spindle in oocytes, telophase results in the extrusion of a  
44 small polar body.

45 The MPF is composed of two classes of molecules that orchestrate progression  
46 through both M-phases of mitosis and meiosis: a family of cyclin-dependent  
47 serine/threonine kinases (CDKs) and their binding partners, cyclins (Morgan, 2007).  
48 While there are three M-phase *CcnB* mRNAs present in mammals (*B1*, *B2*, and *B3*), most  
49 of the molecular properties of the CDK1/CCNB complex are based on observations of the  
50 CDK1/CCNB1 heterodimer. However, other cyclins, like CCNB2, also interact with CDK1,  
51 activating their phosphotransferase activity (Jackman et al., 1995). CCNB1 and B2 are  
52 thought to be localized in different subcellular compartments (Jackman et al., 1995).  
53 While CCNB1 is either soluble or interacts with microtubules, CCNB2 is associated with  
54 the cellular membrane. During mitosis, CCNB1 translocates into the nucleus while  
55 CCNB2 remains sequestered in the cytoplasm (Jackman et al., 1995).

56 Although all three cyclin mRNAs are detected in mouse oocytes, the CCNB1/CDK1  
57 complex is generally regarded as the major driver of meiosis progression. Little is known  
58 about the role of CCNB3 during oocyte maturation with the exception of one report that  
59 suggests its requirement in meiosis I (Zhang et al., 2015). Conversely, CCNB2 is thought  
60 to be dispensable for mitosis progression. Early attempts to define CCNB2 function either

61 by genetic inactivation of the gene or by knockdown with antisense RNAs have not  
62 produced overt phenotypes; this has led to the conclusion that CCNB2 is dispensable for  
63 either mitosis and meiosis, possibly due to compensation by CCNB1 (Brandeis et al.,  
64 1998; Ledan et al., 2001). However, recent evidence reposes an independent function  
65 for CCNB2 during the mouse meiotic divisions. During experiments investigating the  
66 function of the spindle component NDC80/HEC1 during meiotic prophase, it has been  
67 proposed that CCNB2 stability is dependent on association with HEC1 (Gui and Homer,  
68 2013). Additionally, knockdown of CCNB2 with morpholino oligonucleotides (MO)  
69 markedly decreased meiotic reentry in mouse oocytes (Gui and Homer, 2013). Similar  
70 findings have been reported in a very recent study investigating CCNB1 function in  
71 oocytes (Li et al., 2018). New data from our laboratory has demonstrated that the rate of  
72 translation of the two major CCNBs, B1 and B2, is regulated in a distinct fashion during  
73 meiotic prophase (Han et al., 2017). *CcnB1* mRNA is expressed with three distinct  
74 3'UTRs of different lengths; while translation of the two longer mRNA variants is  
75 repressed in meiotic prophase, a third, short variant is constitutively translated (Yang et  
76 al., 2017). CCNB1 protein is detectable in meiotic prophase albeit at levels that are low  
77 compared to M-phase. During prometaphase, the translation of the two longer variants is  
78 activated and drives the large accumulation of the CCNB1 protein (Yang et al., 2017).  
79 Although the two *CcnB2* mRNA variants are also detected, the rate of translation of  
80 *CcnB2* mRNA is high in prophase I and the protein is readily detectable—a feature  
81 reminiscent of that reported in frog oocytes (Piqué et al., 2008).

82 The above findings open the possibility that CCNB2 is considerably more abundant  
83 than CCNB1 in prophase I (GV)-arrested oocytes. Prompted by these observations, we  
84 have further investigate the function of CCNB2 during mouse oocyte meiotic progression.  
85 Using previously generated *Ccnb2*<sup>-/-</sup> mice (Brandeis et al., 1998), we show that oocytes  
86 deficient in CCNB2 are developmentally compromised, as documented by the subfertility  
87 of these mice. This sub-fertility phenotype is due to inefficient oocyte reentry and  
88 progression through the meiotic cell cycle with blocks at different stages of meiosis. Thus,  
89 we conclude that CCNB2 plays a significant role during mouse oocyte meiosis, which  
90 cannot be compensated for by endogenous CCNB1.

91



## 93 RESULTS

### 94 *Contrasting CcnB1 and CcnB2 mRNA translation rates define the pattern of expression* 95 *of the two cyclins at the prophase I to metaphase I transition*

96 We have previously reported that the patterns of ribosome loading onto the *CcnB1*  
97 and *CcnB2* mRNAs in fully-grown mouse oocytes are considerably different (Han et al.,  
98 2017). Here, we confirmed and extended this initial observation with a detailed time  
99 course experiment monitoring ribosome loading onto the two mRNAs in GV oocytes and  
100 during progression through metaphase I (MI) (Fig. 1, A and B). The overall mRNA levels  
101 for the two cyclins are comparable (Input, Fig. 1, A and B). However, while little ribosome  
102 loading onto *CcnB1* mRNA is detected in GV oocytes, ribosome loading onto *CcnB2*  
103 mRNA is considerably higher. These indirect measurements of translation are  
104 corroborated by mining data sets assessing poly(A)-tail length of mRNAs in GV oocytes  
105 (Morgan et al., 2017). The *CcnB2* mRNA has a significantly longer poly(A)-tail as  
106 compared to *CcnB1* (Fig. 1 C); increased poly(A)-tail length has been associated with an  
107 increased rate of translation (Reyes and Ross, 2016).

108 During meiotic progression, little or no changes in ribosome loading onto the  
109 *CcnB2* mRNA were detected up to MI, whereas major changes in *CcnB1* association with  
110 ribosomes take place during MI (Fig. 1 A). This differential pattern of translation is in good  
111 accordance with data from previous experiments using luciferase reporters tagged with  
112 the 3'UTRs of the two mRNAs (Han et al., 2017). We also have shown that alternate  
113 polyadenylation signal usage (APA) plays a major role in defining the 3'UTR length and  
114 translation rate of *CcnB1* mRNA (Yang et al., 2017). Since the *CcnB2* mRNA 3'UTR also  
115 contains an internal polyadenylation signal, we compared the translation rate of the two  
116 3'UTR variants. *CcnB1* 3'UTR short and long constructs were used as a control. The rates  
117 of translation of the two *CcnB2* 3'UTR reporters are comparable in GV oocytes (Fig. 1 D)  
118 and do not change significantly during oocyte maturation. However, the rate of translation  
119 driven by the long *CcnB1* 3'UTR is considerably lower than that of either *CcnB2* 3'UTRs  
120 (Fig. 1 D). Only the rate of translation of the short *CcnB1* 3'UTR approximates those of  
121 *CcnB2* 3'UTR. These findings consolidate the concept that rates of translation of the two  
122 cyclin mRNAs are significantly different. Since previous experiments indicate comparable  
123 degradation rates of the two proteins in GV (Han et al., 2017), we hypothesize that

124 CCNB2 accumulates in GV-arrested oocytes at higher levels than CCNB1. During oocyte  
125 maturation, CCNB1 accumulation increases while CCNB2 remains relatively unchanged,  
126 opening the possibility of a shift in the stoichiometry of CCNB/CDK1 complex.

127

### 128 *CcnB2<sup>-/-</sup> female mice display defects in fecundity*

129 Together with a previous report (Gui and Homer, 2013), the above findings are at odds  
130 with the widely held notion that CCNB2 is dispensable for oocyte maturation. Therefore,  
131 we have re-evaluated the fertility phenotype of the previously generated *CcnB2<sup>-/-</sup>* mice  
132 (Brandeis et al., 1998).

133 While both *CcnB2<sup>+/-</sup>* and *CcnB2<sup>-/-</sup>* mice are fertile and produce pups, *CcnB2<sup>-/-</sup>* mice  
134 show compromised fecundity (Fig. 2 A). This phenotype is not due to embryonic lethality  
135 of the *CcnB2<sup>-/-</sup>* pups since there is no statistically significant deviation from the expected  
136 Mendelian ratio when heterozygous males and females were mated—suggesting that  
137 CCNB2 is dispensable for embryo development (Fig. S1 A). Furthermore, *CcnB2<sup>-/-</sup>*  
138 females generate fewer pups even when crossed with wild type (WT) males, indicating  
139 that the sub-fertility is associated with the female. *CcnB2<sup>-/-</sup>* females gave birth to fewer  
140 pups (reduced litter size) and fecundity declined rapidly with age, suggesting premature  
141 ovarian failure (Fig. 2 A and Fig. S1, B and C). This fecundity phenotype may be caused  
142 by delayed puberty and/or ovarian or oocyte dysfunction. Delayed puberty is ruled out as  
143 the pregnancy rates of mated *CcnB2<sup>-/-</sup>* females did not improve over a period of nine  
144 months. Furthermore, the age at first pregnancy of *CcnB2<sup>+/+</sup>* and *CcnB2<sup>-/-</sup>* females are  
145 comparable (Fig. S1 D). Consistent with the original report (Brandeis et al., 1998), while  
146 *CcnB2<sup>+/-</sup>* pups are indistinguishable from the *CcnB2<sup>+/+</sup>* littermates, the *CcnB2<sup>-/-</sup>* pups were  
147 significantly smaller, weighing an average  $1.4 \pm 0.35$  g less than the *CcnB2<sup>+/+</sup>* siblings  
148 (Fig. 2 B). The adult ovarian morphology of the *CcnB2<sup>-/-</sup>* mice is unremarkable, with all  
149 the follicle developmental stages and corpora lutea present (Fig. 2 C). To further assess  
150 ovarian function and monitor follicle maturation/ovulation potential, pre-pubertal females  
151 were injected with PMSG followed by hCG, a regimen which induces ovulation. Slightly  
152 fewer oocytes were retrieved from *CcnB2<sup>-/-</sup>* females, while oocyte diameters are identical  
153 between *CcnB2<sup>+/+</sup>* and *CcnB2<sup>-/-</sup>* females (Supplemental Fig. S1, E and F).

### 154 *Timing of oocyte maturation is aberrant in CcnB2<sup>-/-</sup> oocytes*

155 Western blot analysis of *CcnB2*<sup>+/-</sup> and *CcnB2*<sup>-/-</sup> oocyte extracts reveal a gene dose-  
156 dependent decrease of CCNB2 protein (Fig. 3 A). Loss of CCNB2 does not affect CDK1  
157 protein levels, indicating no effect on either synthesis or stability of the kinase moiety.  
158 Recently, it was reported that oocyte-specific knockout of CCNB1 results in the  
159 overexpression of CCNB2 (Li et al., 2018); however, in *CcnB2*<sup>-/-</sup> oocytes, the level of  
160 CCNB1 is not obviously altered (Fig. S2 A). To understand the extent by which CDK1  
161 activity depends on CCNB2, we measured the CDK1 kinase activity using two  
162 independent strategies. In the first paradigm, extracts from *CcnB2*<sup>+/+</sup> and *CcnB2*<sup>-/-</sup> oocytes  
163 were incubated with a CDK1 substrate (GST-PP1) and phosphorylation was measured  
164 by phosphosite-specific antibodies (pT320-PP1) (Daldello et al., 2015; Lewis et al., 2013).  
165 There is a highly significant decrease in CDK1 activity in extracts from *CcnB2*<sup>-/-</sup> oocytes  
166 (Fig. 3, B and C). MPF activity was also measured in whole oocytes using a previously  
167 described CDK1-FRET reporter assay (Gavet and Pines, 2010a; Gavet and Pines,  
168 2010b). In GV-arrested *CcnB2*<sup>-/-</sup> oocytes, FRET signal is decreased as compared to  
169 maturing *CcnB2*<sup>+/+</sup> oocytes (Fig. S2 B).

170 Given that the above data are consistent with decreased pre-MPF activity, we  
171 investigated whether spontaneous maturation is affected in *CcnB2*<sup>-/-</sup> oocytes. While  
172 *CcnB2*<sup>+/+</sup> and *CcnB2*<sup>+/-</sup> oocytes resume meiosis in a highly synchronous manner (GVBD  
173 time= 1.5 ±1.1 hrs and 1.8 ±1.1 hrs, respectively), meiotic reentry of *CcnB2*<sup>-/-</sup> oocytes is  
174 significantly delayed (GVBD time= 4.3 ±3.7 hrs). A more detailed analysis of the  
175 maturation time course shows the presence of two subpopulations of *CcnB2*<sup>-/-</sup> oocytes.  
176 The first population resumes meiosis within the first four hours post-Cilostamide release,  
177 though the GVBD time is still delayed compared to *CcnB2*<sup>+/+</sup> oocytes. The second  
178 population resumes meiosis in a stochastic manner, with oocytes undergoing GVBD even  
179 after 16 hours post-Cilostamide release (Fig. 3 D and Fig. S2 C). Furthermore, the time  
180 of GVBD in *CcnB2*<sup>-/-</sup> oocytes is inversely correlated with CDK1 activity of the same  
181 oocytes at GV (Fig. S2 D), but there is no correlation between GVBD time and oocyte  
182 diameter (Fig. S2 E). If a decreased MPF activity were solely responsible for delayed  
183 meiosis resumption in these oocytes, the overexpression of cyclins should rescue the  
184 phenotype. Indeed, overexpression of *CcnB1-mCherry* in *CcnB2*<sup>-/-</sup> oocytes restores the  
185 GVBD time to that of *CcnB2*<sup>+/+</sup> oocytes (Fig. 3E), and oocytes expressing higher levels of



186 CCNB1 undergo GVBD earlier (Fig. S2 F). Of note, CCNB1-mCherry, but also CCNB2-  
187 mCherry, translocate into the nucleus with the same kinetics (Fig. S2 G). These findings  
188 strongly support the hypothesis that CCNB2 protein accumulation in prophase I is  
189 required to generate sufficient CDK activity for timely reentry into meiosis, and that  
190 oocytes with lower pre-MPF activity resume meiosis in a delayed fashion.  
191 *PKA inactivation-dependent events are intact whereas CDK1-dependent events are*  
192 *disrupted in CcnB2<sup>-/-</sup> oocytes*

193 In order to further define the molecular defects associated with CCNB2 depletion in  
194 the oocyte during the G<sub>2</sub>/M transition, we examined the timing of CDC25B translocation.  
195 We have previously shown that in mouse oocytes, CDC25B import into the nucleus is  
196 one of the first detectable events following the decrease in cAMP, the signal that  
197 maintains oocyte meiotic arrest (Oh et al., 2010). Therefore, we injected oocytes with  
198 *CDC25B*-(phosphatase dead)-*YFP* to follow the kinetics of CDC25B translocation in intact  
199 oocytes (Fig. 4 A). All *CcnB2*<sup>+/+</sup> oocytes mature in a synchronous manner (Fig. S3 A) and  
200 the YFP-tagged CDC25B signal is detected in the nucleus at as early as 15 mins post-  
201 Cilostamide release (Fig. S3 B). However, there are two populations of *CcnB2*<sup>-/-</sup> oocytes  
202 (early GVBD and late GVBD) (Fig. S3 E). CDC25B translocation in both *CcnB2*<sup>+/+</sup> and  
203 *CcnB2*<sup>-/-</sup> oocytes continues until the oocytes undergo GVBD, at which point CDC25B  
204 diffuses throughout the cytoplasm (Fig. 4 A). No significant difference in CDC25B  
205 translocation rate are found between *CcnB2*<sup>+/+</sup> oocytes and the two *CcnB2*<sup>-/-</sup> populations  
206 (Fig. 4 C). However, since GVBD time is delayed in *CcnB2*<sup>-/-</sup> oocytes, CDC25B  
207 accumulation in the nucleus continues for longer periods of time, resulting in higher  
208 CDC25B reporter signal in the nucleus (Fig. S3 C). This difference in the CDC25B  
209 nuclear/cytoplasmic ratio is not due to differences in the amount of reporter expressed  
210 (Fig. S3 D). These measurements document that CDC25B translocation occurs normally  
211 in *CcnB2*<sup>-/-</sup> oocytes and that the rate of import is not affected by the decrease in MPF  
212 activity. Moreover, they indicate that PKA downregulation occurs normally in the *CcnB2*<sup>-/-</sup>  
213 oocytes. Remarkably, these findings also demonstrate that CDC25B translocation alone  
214 was not sufficient to trigger GVBD in the *CcnB2*<sup>-/-</sup> oocytes.

215 CDC25B translocation is followed by CCNB1 import into the nucleus and WEE1B  
216 export out of the nucleus preceding GVBD (Oh et al., 2010). Effects on CCNB1 import



217 could not be measured in *CcnB2*<sup>-/-</sup> oocytes because of its rescuing effect (see below).  
218 However, YFP-tagged WEE1B export from the nucleus occurs over a wide range of time,  
219 consistent with the variable timing of GVBD (Fig. 4 B). *CcnB2*<sup>-/-</sup> oocytes show significantly  
220 decreased WEE1B translocation rates as compared to *CcnB2*<sup>+/+</sup> oocytes (Fig. 4 D);  
221 WEE1B translocation rate is inversely correlated to GVBD time (Fig. S3 F). We have  
222 previously demonstrated that WEE1B export is dependent on CDK1 activity (Oh et al.,  
223 2010); therefore, the decreased WEE1B export rate observed in *CcnB2*<sup>-/-</sup> oocytes  
224 indicates slower CDK1 activation. Furthermore, we tracked CDK1 activation in live  
225 oocytes using a FRET approach to confirm that the speed of CDK1 activation is reduced  
226 in *CcnB2*<sup>-/-</sup> oocytes. The speed of CDK1 activation, measured by the Hill slope of FRET  
227 activation before GVBD, is significantly decreased in *CcnB2*<sup>+/-</sup> and *CcnB2*<sup>-/-</sup> oocytes (Fig.  
228 S3, G and H). These results indicate that, in the absence of CCNB2, CDK1 activation is  
229 no longer switch-like but becomes gradual, resulting in inefficient WEE1B export and  
230 delayed GVBD.

### 231 *Translation of key cell cycle components is defective in CcnB2*<sup>-/-</sup> oocytes

232 Consistent with findings in *Xenopus* oocytes, we have previously shown that, at  
233 least in part, the translational program in mouse oocytes is dependent on CDK1 activity  
234 (Ballantyne et al., 1997; Han et al., 2017). Since CDK1 activation is likely defective in  
235 *CcnB2*<sup>-/-</sup> oocytes, we tested whether CDK1-dependent translation would also be affected  
236 in these oocytes. Oocytes were co-injected with mRNA coding for *mCherry* (loading  
237 control) and an YFP reporter fused to either *CcnB1*-long 3'UTR or *Mos* 3'UTR. The  
238 accumulation of YFP and mCherry for individual oocytes was recorded throughout meiotic  
239 maturation and signals were expressed as ratios of YFP/mCherry (Fig. S4). The rates of  
240 translation were calculated for before (0-2 hrs) and after (4-8 hrs) GVBD for *YFP-CcnB1*-  
241 long 3'UTR (Fig. 5 A) and *YFP-Mos* 3'UTR (Fig. 5 B). As previously shown, the translation  
242 of both *YFP-CcnB1*-long 3'UTR and *YFP-Mos* 3'UTR increases during meiosis in  
243 *CcnB2*<sup>+/+</sup> oocytes. In the absence of CCNB2, the translational activation varies widely  
244 with a population of oocytes showing a protein synthesis pattern similar to that of *CcnB2*<sup>+/+</sup>  
245 oocytes and a population in which translation activation is absent or reduced for both  
246 reporters (Fig. 5 A).

247 It is well established that spindle formation requires protein synthesis and, in  
248 particular, the accumulation of CCNB1, which is necessary to increase MPF activity  
249 (Davydenko et al., 2013; Hampl and Eppig, 1995; Winston, 1997). Since we have shown  
250 that *CcnB2*<sup>-/-</sup> oocytes have less pre-MPF activity (Fig. 3 B-C) and that the rates of YFP-  
251 CCNB1-long 3'UTR accumulation are decreased (Fig. 5 A), we predicted a delay in the  
252 time of spindle formation in *CcnB2*<sup>-/-</sup> oocytes. *CcnB2*<sup>+/+</sup> and *CcnB2*<sup>-/-</sup> oocytes were  
253 matured *in vitro* and fixed eight hours after meiotic resumption and the spindle was  
254 visualized via  $\beta$ -tubulin staining. While more than 80 percent of *CcnB2*<sup>+/+</sup> oocytes have a  
255 MI bipolar spindle, 60 percent of the *CcnB2*<sup>-/-</sup> oocytes display no or early spindle (Fig. 5  
256 C). Together, these findings support a role of CCNB2 in CDK1-dependent translation of  
257 CCNB1 and MOS and the timely assembly of MI spindle.

258  
259 *Delayed MI/anaphase I transition in CcnB2*<sup>-/-</sup> oocytes is associated with defective APC  
260 activity and persistent activation of the SAC

261 To define whether additional defects in meiotic progression are associated with  
262 CCNB2 depletion, we examined the ability of *CcnB2*<sup>-/-</sup> oocytes to complete meiosis I. First  
263 polar body extrusion (PBE I) is both significantly delayed and decreased in these oocytes  
264 (Fig 6 A). In addition, only 30 percent of the *CcnB2*<sup>-/-</sup> oocytes reach MII with a well formed  
265 spindle and aligned metaphase chromosomes, while the rest of the *CcnB2*<sup>-/-</sup> oocytes are  
266 arrested in MI or at telophase I (Fig. 6, B and C). This phenotype is not due to unfavorable  
267 *in vitro* culture conditions because the same analysis of *in vivo* ovulated oocytes also  
268 clearly shows compromised progression to MII in *CcnB2*<sup>-/-</sup> oocytes (Fig. S5 A).

269 A compromised MI/anaphase I transition may result from defects in the activation  
270 of the APC/CDC20 complex, which promotes the degradation of securin and cyclins. To  
271 assess this possibility, oocytes were injected with *Securin-YFP* mRNA to monitor the  
272 kinetics of APC activation in live oocytes. Securin degradation is temporally delayed and  
273 inefficient in *CcnB2*<sup>-/-</sup> oocytes (Fig. 6 D). The rate of securin degradation was calculated  
274 between six and 10 hours after GVBD and *CcnB2*<sup>-/-</sup> oocytes display a 50 percent  
275 decrease in degradation rates (Fig. S5 B).

276 It has been reported that CDK1 activates APC directly and indirectly (Adhikari et  
277 al., 2014; Golan et al., 2002; Lahav-Baratz et al., 1995; Qiao et al., 2016; Yang and

278 Ferrell, 2013), and this activity is critical for satisfaction of the spindle assembly  
279 checkpoint (SAC) (Lara-Gonzalez et al., 2012). Using a FRET probe, we measured  
280 changes in CDK1 activity of single oocytes between two and six hours after GVBD.  
281 *CcnB2*<sup>-/-</sup> oocytes that extrude the first polar body have increased CDK1 activity similar to  
282 that of *CcnB2*<sup>+/+</sup> oocytes, while CDK1 activation is decreased in *CcnB2*<sup>-/-</sup> oocytes unable  
283 to complete meiosis I (Fig. S5 C). Moreover, APC activation is rescued by overexpression  
284 of CCNB1 in *CcnB2*<sup>-/-</sup> oocytes (Fig. 6 E, Fig. S5 D).

285 Since a population of *CcnB2*<sup>-/-</sup> oocytes is unable to complete meiosis I, we  
286 investigated if the inability to progress to anaphase I may be due to the presence of  
287 unattached chromosomes and an active SAC. MAD2 co-localization with the kinetochore,  
288 as visualized by CREST antibody, has been used as an tool to measure SAC activation  
289 (Collins et al., 2015; Gui and Homer, 2012). *CcnB2*<sup>+/+</sup> and *CcnB2*<sup>-/-</sup> oocytes were fixed at  
290 either seven or 24 hours post-meiotic resumption and MAD2/CREST ratios were  
291 measured. *CcnB2*<sup>+/+</sup> oocytes display low MAD2 signals on the kinetochores at both times,  
292 indicating that the SAC had been satisfied (Fig. 7, A and B). Pharmacological  
293 depolymerization of the spindle with Nocodazole strongly activates the SAC in *CcnB2*<sup>+/+</sup>  
294 oocytes, and MAD2 localizes on the spindle at most of the kinetochores (Fig. 7, A and B).  
295 *CcnB2*<sup>-/-</sup> oocytes that reach MII display MAD2 levels on the kinetochores that are  
296 comparable to that of *CcnB2*<sup>+/+</sup> oocytes arrested in MII (Fig. 7, A and B). Conversely,  
297 *CcnB2*<sup>-/-</sup> oocytes unable to complete meiosis I after 24 hours display significantly higher  
298 levels of MAD2 on the kinetochores than *CcnB2*<sup>+/+</sup> MI oocytes (Fig. 7, A and B). This  
299 finding suggests that the MI-arrested *CcnB2*<sup>-/-</sup> oocytes do not transition to anaphase I  
300 because SAC is still active. It is known that oocytes can tolerate some unattached  
301 kinetochores and still proceed to anaphase I (Lane et al., 2012); therefore an additional  
302 experiment was performed to confirm that an active SAC is indeed the cause of the MI  
303 arrest in *CcnB2*<sup>-/-</sup> oocytes. Inhibition of MPS1 with Reversine is known to prevent MAD2  
304 localization on the kinetochores and suppresses the activity of SAC (Tipton et al., 2013).  
305 The length of meiosis I was measured as the time interval between GVBD and PBE I (Fig.  
306 7 C). Meiosis lasts longer in *CcnB2*<sup>-/-</sup> oocytes than in *CcnB2*<sup>+/+</sup> oocytes (WT: 8.25 ±2.5  
307 hrs; KO: 11.7 ±3.0 hrs). Pharmacological SAC inhibition shortens meiosis I in both  
308 *CcnB2*<sup>+/+</sup> (5.6 ±0.8 hrs) and *CcnB2*<sup>-/-</sup> (5.3 ±1.1 hrs) oocytes, and virtually all the oocytes

309 complete meiosis I with comparable time courses, regardless of the genotype. Thus, the  
310 persistent SAC activity in *CcnB2*<sup>-/-</sup> oocytes is indeed the cause of the delayed in PBE I  
311 timing and/or the arrest in MI. All together, these findings indicate that *CcnB2*<sup>-/-</sup> oocytes  
312 are less efficient in satisfying the SAC, leading to defective APC activation and, ultimately,  
313 a delayed or failed to exit from MI. These defects are rescued by overexpression of  
314 CCNB1.  
315

## 316 DISCUSSION

317 Our findings conclusively establish that, in the oocyte, CCNB2 plays a critical role  
318 during meiosis I both at the G<sub>2</sub>/M and the MI/anaphase I transitions — functions that are  
319 not compensated for by endogenous CCNB1. CCNB2 contributes to pre-MPF activity  
320 during prophase and is required to generate sufficient MPF to progress through  
321 maturation in a timely and efficient fashion (Fig. 3). Moreover, loss of CCNB2 is  
322 associated with ovulation of immature oocytes and/or oocytes with compromised  
323 developmental competence, resulting in decreased fecundity in *CcnB2*<sup>-/-</sup> females (Fig. 2).

324 Initial evidence suggests that *CcnB2* mRNA is translated at a higher rate than  
325 *CcnB1* mRNA in prophase. First, the overall levels of *Ccnb2* and *Ccnb1* transcripts are  
326 comparable, *CcnB2* is translated at a higher rate than *CcnB1* in GV-arrested oocytes (Fig.  
327 1, A and B). Second, two *CcnB2* and three *CcnB1* isoforms with 3' UTRs of varying  
328 lengths are expressed. While both *CcnB2* isoforms are highly translated in prophase, only  
329 the short isoform of *CcnB1* is translated at high levels during this time (Fig. 1 D) (Han et  
330 al., 2017; Yang et al., 2017). Third, our previous polysomal array data confirms higher  
331 recruitment of *CcnB2* to the polysome as compared to *CcnB1* (Han et al., 2017).  
332 Furthermore, we have previously reported similar rates of degradation for the two proteins  
333 in GV oocytes in the presence of cycloheximide (Han et al., 2017). Taken together, these  
334 data indicate that CCNB2 protein is present at higher concentrations than CCNB1 in GV-  
335 arrested oocytes, supporting a central role for CCNB2 during meiosis I.

336 CCNB2 is critical to generate sufficient levels of pre-MPF in the GV oocyte, and by  
337 using both whole cell and *in vitro* kinase assays, we show that *CcnB2*<sup>-/-</sup> oocytes have  
338 decreased CDK1 activity as compared to *CcnB2*<sup>+/+</sup> oocytes (Fig. 3 B, Fig. S2 B). Due to  
339 this decreased pre-MPF activity, conversion of pre-MPF to MPF is also affected. This was  
340 confirmed by measuring MPF activation via a FRET probe (Fig. S3, G and H) and by  
341 observing the export kinetics of WEE1B from the nucleus, an event shown to be CDK1  
342 dependent (Fig. 4 B) (Oh et al., 2010). CDK1 activation in *CcnB2*<sup>-/-</sup> oocytes no longer  
343 displays a switch-like property as in *CcnB2*<sup>+/+</sup>, but rather increases slowly over a long  
344 period of time. As a consequence of this gradual increase, GVBD becomes an inefficient  
345 process, becoming error-prone (Fig. 3 D). Thus, a subset of *CcnB2*<sup>-/-</sup> oocytes are unable  
346 to transition from prophase I to MI even after prolonged culture times.

347 Previous attempts to deplete oocytes of CCNB2 with MO indicate an 80 percent  
348 decrease in meiotic reentry three hours post-IBMX release (Gui and Homer, 2013). This  
349 finding led the authors to conclude that CCNB2-depleted oocytes do not reenter meiosis.  
350 Our data, instead, show that meiotic reentry is delayed, but not abolished. A possible  
351 explanation of these distinct outcomes is the distinct effects of acute and chronic depletion  
352 of CCNB2 (El-Brolosy and Stainier, 2017). It should be pointed out that in the study of Gui  
353 and Homer, only the first three hours of meiotic resumption were reported, and therefore,  
354 any further delay in maturation may have been overlooked. Similarly, Li et al. observed a  
355 decrease in meiotic maturation in *CcnB2*<sup>-/-</sup> oocytes. Again, only the first three hours of  
356 maturation were reported. Therefore, neither studies explored CCNB2 function beyond  
357 the G<sub>2</sub>/M transition.

358 In our study, we have further surveyed the role of CCNB2 throughout meiotic  
359 maturation and have detected additional phenotypes. Indeed, depletion of CCNB2  
360 disrupts the increase in CDK1 activity that normally occurs during prometaphase (Fig. S5  
361 C). This defective CDK1 activation may be dependent on both direct effects due to the  
362 absence of CDK1/CCNB2 complex and indirect effects on the activity of CDK1 in complex  
363 with CCNB1. This is predicted by the decreased rate of *CcnB1* mRNA translation in a  
364 subset of *CcnB2*<sup>-/-</sup> oocytes (Fig. 5). Additionally, the decreased translation of *Mos* mRNA  
365 likely affects the positive feedback between the ERK pathway and MPF (Nebreda and  
366 Ferby, 2000)(Fig. 5).

367 Deficient CDK1 activity in MI has several consequences. There is a delay in  
368 spindle assembly (Fig. 5C), which recapitulates previous experiments using  
369 pharmacological inhibition of CDK1 (Davydenko et al., 2013). Similarly, SAC inactivation  
370 is incomplete in the *CcnB2*<sup>-/-</sup> oocytes leading to defective APC activation. Indeed, stable  
371 microtubule attachments to the kinetochores have been shown to depend on the increase  
372 in CDK1 activity (Davydenko et al., 2013). In agreement with these findings, disruption of  
373 CDK1 activity via depletion of CCNB2 results in persistent MAD2 loading onto the  
374 kinetochores (Fig. 7 B). Inhibition of the checkpoint with Reversine restores the oocyte  
375 ability to progress to anaphase (Fig. 7 C). Downstream of SAC satisfaction is the  
376 activation of APC/C. Our data indicate that, without CCNB2, there is a major delay in APC  
377 activation as measured by securin degradation (Fig. 6 D). In *CcnB2*<sup>-/-</sup> oocytes, APC

378 activation is not switch-like as in *CcnB2*<sup>+/+</sup> oocytes, but instead, prolonged and gradual—  
379 in agreement with the idea that an threshold of CDK1 activity is required for full APC  
380 activation (Yang and Ferrell, 2013). Thus, in *CcnB2*<sup>-/-</sup> oocytes, the switch-like entry into  
381 and exit from meiosis I is disrupted, resulting in non-synchronous, delayed, and  
382 sometimes failed G<sub>2</sub>/M and MI/anaphase I transitions.

383 In summary, our findings establish a unique function for CCNB2 during mouse  
384 oocyte meiosis that cannot be compensated for by endogenous levels of CCNB1. We  
385 show, however, that overexpression of exogenous CCNB1 completely rescues the effect  
386 of CCNB2 depletion both during the GV/MI (Fig. 3 E) and the MI/anaphase I transitions  
387 (Fig. 6 E). In a reciprocal study using *CcnB1*<sup>-/-</sup> mice, endogenous CCNB2 alone is able to  
388 drive oocyte progression through meiosis I, but the oocytes could not progress to MII.  
389 However, overexpression of exogenous CCNB2 rescues the MII entry (Li et al., 2018, 2).  
390 Taken together, these two complementary studies indicate that the two cyclin proteins  
391 have overlapping function at the molecular level. The difference in ability of exogenous  
392 and endogenous proteins to rescue meiosis progression is likely due to the constitutive  
393 overexpression of the exogenous protein, while expression of the endogenous protein is  
394 under the temporal control of the oocyte translational program. Indeed, we have  
395 previously shown that the translation of *CcnB2* and *CcnB1* mRNAs is markedly different;  
396 *CcnB2* is constitutively translated in GV and MI, but decreased in MII, whereas the  
397 recruitment of *CcnB2* mRNA to the polysome increases at MI and further increases at MII  
398 (Fig. 1) (Han et al., 2017). Translation of endogenous *CcnB2* decreases in MII explaining  
399 its inability to compensate for the absence of CCNB1 at this stage. These findings  
400 emphasize the importance of the post-transcriptional program in regulating meiotic  
401 divisions. Indeed, the distinct temporal translational control of these two related genes  
402 dictate the appropriate cyclin levels to orchestrate faithful progression through meiosis.

403 Given our findings, we propose that the CCNB2-depleted oocytes may be used as  
404 a model for defective CDK1 activation throughout meiosis, a condition that may be a  
405 significant cause of meiotic maturation block and infertility in humans.

406

407 **ACKNOWLEDGEMENTS**



408 We acknowledge Dr. Tim Hunt and Dr. Jonathon Pines for sharing the *CcnB2*<sup>-/-</sup> mice and  
409 Dr. Rey-Huei Chen for the gift of the MAD2 antibody. The authors are indebted to Dr.  
410 Sophie Dumont for the helpful discussion and advice on the SAC measurements. These  
411 studies were supported by NIH R01 GM097165 and GM116926 to MC. EMD is supported  
412 by a fellowship from the Lalor Foundation.

## **References**

- Adhikari, D. and Liu, K.** (2014). The regulation of maturation promoting factor during prophase I arrest and meiotic entry in mammalian oocytes. *Mol. Cell. Endocrinol.* **382**, 480–487.
- Adhikari, D., Diril, M. K., Busayavalasa, K., Risal, S., Nakagawa, S., Lindkvist, R., Shen, Y., Coppola, V., Tessarollo, L., Kudo, N. R., et al.** (2014). Mastl is required for timely activation of APC/C in meiosis I and Cdk1 reactivation in meiosis II. *J. Cell Biol.* **206**, 843–853.
- Ballantyne, S., Daniel, D. L. and Wickens, M.** (1997). A dependent pathway of cytoplasmic polyadenylation reactions linked to cell cycle control by c-mos and CDK1 activation. *Mol. Biol. Cell* **8**, 1633–1648.
- Brandeis, M., Rosewell, I., Carrington, M., Crompton, T., Jacobs, M. A., Kirk, J., Gannon, J. and Hunt, T.** (1998). Cyclin B2-null mice develop normally and are fertile whereas cyclin B1-null mice die in utero. *Proc. Natl. Acad. Sci.* **95**, 4344–4349.
- Collins, J. K., Lane, S. I. R., Merriman, J. A. and Jones, K. T.** (2015). DNA damage induces a meiotic arrest in mouse oocytes mediated by the spindle assembly checkpoint. *Nat. Commun.* **6**,.
- Daldello, E. M., Le, T., Poulhe, R., Jesus, C., Haccard, O. and Dupré, A.** (2015). Control of Cdc6 accumulation by Cdk1 and MAPK is essential for completion of oocyte meiotic divisions in *Xenopus*. *J. Cell Sci.* **128**, 2482–2496.
- Davydenko, O., Schultz, R. M. and Lampson, M. A.** (2013). Increased CDK1 activity determines the timing of kinetochore-microtubule attachments in meiosis I. *J. Cell Biol.* **202**, 221–229.
- El-Brolosy, M. A. and Stainier, D. Y. R.** (2017). Genetic compensation: A phenomenon in search of mechanisms. *PLOS Genet.* **13**, e1006780.
- Gavet, O. and Pines, J.** (2010a). Progressive Activation of CyclinB1-Cdk1 Coordinates Entry to Mitosis. *Dev. Cell* **18**, 533–543.
- Gavet, O. and Pines, J.** (2010b). Activation of cyclin B1–Cdk1 synchronizes events in the nucleus and the cytoplasm at mitosis. *J. Cell Biol.* **189**, 247–259.

- Golan, A., Yudkovsky, Y. and Hershko, A.** (2002). The Cyclin-Ubiquitin Ligase Activity of Cyclosome/APC Is Jointly Activated by Protein Kinases Cdk1-Cyclin B and Plk. *J. Biol. Chem.* **277**, 15552–15557.
- Gui, L. and Homer, H.** (2012). Spindle assembly checkpoint signalling is uncoupled from chromosomal position in mouse oocytes. *Development* **139**, 1941–1946.
- Gui, L. and Homer, H.** (2013). Hec1-Dependent Cyclin B2 Stabilization Regulates the G2-M Transition and Early Prometaphase in Mouse Oocytes. *Dev. Cell* **25**, 43–54.
- Hampfl, A. and Eppig, J. J.** (1995). Translational regulation of the gradual increase in histone H1 kinase activity in maturing mouse oocytes. *Mol. Reprod. Dev.* **40**, 9–15.
- Han, S. J., Martins, J. P. S., Yang, Y., Kang, M. K., Daldello, E. M. and Conti, M.** (2017). The Translation of Cyclin B1 and B2 is Differentially Regulated during Mouse Oocyte Reentry into the Meiotic Cell Cycle. *Sci. Rep.* **7**,.
- Jackman, M., Firth, M. and Pines, J.** (1995). Human cyclins B1 and B2 are localized to strikingly different structures: B1 to microtubules, B2 primarily to the Golgi apparatus. *EMBO J.* **14**, 1646–1654.
- Lahav-Baratz, S., Sudakin, V., Ruderman, J. V. and Hershko, A.** (1995). Reversible phosphorylation controls the activity of cyclosome-associated cyclin-ubiquitin ligase. *Proc. Natl. Acad. Sci.* **92**, 9303–9307.
- Lane, S. I. R., Yun, Y. and Jones, K. T.** (2012). Timing of anaphase-promoting complex activation in mouse oocytes is predicted by microtubule-kinetochore attachment but not by bivalent alignment or tension. *Development* **139**, 1947–1955.
- Lara-Gonzalez, P., Westhorpe, F. G. and Taylor, S. S.** (2012). The Spindle Assembly Checkpoint. *Curr. Biol.* **22**, R966–R980.
- Ledan, E., Polanski, Z., Terret, M.-E. and Maro, B.** (2001). Meiotic Maturation of the Mouse Oocyte Requires an Equilibrium between Cyclin B Synthesis and Degradation. *Dev. Biol.* **232**, 400–413.
- Lewis, C. W., Taylor, R. G., Kubara, P. M., Marshall, K., Meijer, L. and Golsteyn, R. M.** (2013). A western blot assay to measure cyclin dependent kinase activity in cells or in vitro without the use of radioisotopes. *FEBS Lett.* **587**, 3089–3095.

- Li, J., Tang, J.-X., Cheng, J.-M., Hu, B., Wang, Y.-Q., Aalia, B., Li, X.-Y., Jin, C., Wang, X.-X., Deng, S.-L., et al.** (2018). Cyclin B2 can compensate for Cyclin B1 in oocyte meiosis I. *J. Cell Biol.* jcb.201802077.
- Morgan, D. O.** (2007). *The cell cycle: principles of control*. London : Sunderland, MA: Published by New Science Press in association with Oxford University Press ; Distributed inside North America by Sinauer Associates, Publishers.
- Morgan, M., Much, C., DiGiacomo, M., Azzi, C., Ivanova, I., Vitsios, D. M., Pistolic, J., Collier, P., Moreira, P. N., Benes, V., et al.** (2017). mRNA 3' uridylation and poly(A) tail length sculpt the mammalian maternal transcriptome. *Nature* **548**, 347–351.
- Nebreda, A. R. and Ferby, I.** (2000). Regulation of the meiotic cell cycle in oocytes. *Curr. Opin. Cell Biol.* **12**, 666–675.
- Oh, J. S., Han, S. J. and Conti, M.** (2010). Wee1B, Myt1, and Cdc25 function in distinct compartments of the mouse oocyte to control meiotic resumption. *J. Cell Biol.* **188**, 199–207.
- Piqué, M., López, J. M., Foissac, S., Guigó, R. and Méndez, R.** (2008). A Combinatorial Code for CPE-Mediated Translational Control. *Cell* **132**, 434–448.
- Qiao, R., Weissmann, F., Yamaguchi, M., Brown, N. G., VanderLinden, R., Imre, R., Jarvis, M. A., Brunner, M. R., Davidson, I. F., Litos, G., et al.** (2016). Mechanism of APC/C<sup>CDC20</sup> activation by mitotic phosphorylation. *Proc. Natl. Acad. Sci.* **113**, E2570–E2578.
- Reyes, J. M. and Ross, P. J.** (2016). Cytoplasmic polyadenylation in mammalian oocyte maturation: Oocyte cytoplasmic polyadenylation. *Wiley Interdiscip. Rev. RNA* **7**, 71–89.
- Thornton, B. R. and Toczyski, D. P.** (2006). Precise destruction: an emerging picture of the APC. *Genes Dev.* **20**, 3069–3078.
- Tipton, A. R., Ji, W., Sturt-Gillespie, B., Bekier, M. E., Wang, K., Taylor, W. R. and Liu, S.-T.** (2013). Monopolar Spindle 1 (MPS1) Kinase Promotes Production of Closed MAD2 (C-MAD2) Conformer and Assembly of the Mitotic Checkpoint Complex. *J. Biol. Chem.* **288**, 35149–35158.
- Winston, N. J.** (1997). Stability of cyclin B protein during meiotic maturation and the first mitotic cell division in mouse oocytes. *Biol. Cell* **89**, 211–219.

**Yang, Q. and Ferrell, J. E.** (2013). The Cdk1–APC/C cell cycle oscillator circuit functions as a time-delayed, ultrasensitive switch. *Nat. Cell Biol.* **15**, 519–525.

**Yang, Y., Yang, C.-R., Han, S. J., Daldello, E. M., Cho, A., Martins, J. P. S., Xia, G. and Conti, M.** (2017). Maternal mRNAs with distinct 3' UTRs define the temporal pattern of *Ccnb1* synthesis during mouse oocyte meiotic maturation. *Genes Dev.* **31**, 1302–1307.

**Zhang, T., Qi, S.-T., Huang, L., Ma, X.-S., Ouyang, Y.-C., Hou, Y., Shen, W., Schatten, H. and Sun, Q.-Y.** (2015). Cyclin B3 controls anaphase onset independent of spindle assembly checkpoint in meiotic oocytes. *Cell Cycle Georget. Tex* **14**, 2648–2654.

413 **Figure legends**

414 **Fig. 1. Translation of *CcnB1* and *CcnB2* mRNAs is differentially regulated during**  
415 **meiotic maturation in mouse oocytes**

416 **A-B)** RNA-Seq was performed using mRNA extracts of cell lysate (total mRNA) or mRNA  
417 extracts after immunoprecipitation of HA-tagged ribosomes (ribosome-bound mRNA)  
418 from oocytes arrested in prophase with Cilostamide (time 0) or collected 2, 4, 6, and 8 hrs  
419 after meiosis resumption. Counts per million (CPM) mapped reads are reported for *CcnB1*  
420 **(A)** and *CcnB2* **(B)**; average CPMs of two independent biological replicates with range  
421 are reported. **C)** Poly(A) tail lengths of the *CcnB1* and *CcnB2* mRNAs in GV oocytes. The  
422 data were mined from PMID: 28792939 and are reported as binned values up to 80 (A)  
423 nucleotides. **D)** Rates of translation of *CcnB1* and *CcnB2* mRNA variants in prophase I.  
424 Oocytes were injected with 1:1 mix of YFP-oligo-adenylated 3'UTR (*CcnB2*-short, *CcnB2*-  
425 long, *CcnB1*-short, or *CcnB1*-long) and polyadenylated *mCherry*. Rate of translation in  
426 GV-arrested oocytes were calculated with a 3 hr window at a sampling rate of 15 mins.  
427 T-tests were performed for statistical significance; “ns”: not significant, “\*\*\*\*”: p< 0.0001.

428 **Fig. 2. Compromised fecundity of the *CcnB2*<sup>-/-</sup> mice**

429 **A)** Cumulative number of pups per female derived from different mating schemes. Mating  
430 schemes and number of pairs were as follows: +/+♂ × +/+♀, n= 20; +/-♂ × +/-♀, n= 35; -  
431 -/♂ × -/-♀, n= 6; +/+♂ × -/-♀, n= 6. T-tests were performed between +/-♂ × +/-♀ and -/♂  
432 × -/-♀ (red asterisks) or +/-♂ × +/-♀ and +/+♂ × -/-♀ (blue asterisks); “\*\*\*”: p< 0.01, “\*\*\*\*”:  
433 p< 0.001. Breeding was initiated when the mice reached four weeks of age. **B)** Pup body  
434 weights from +/-♂ × +/-♀ matings were recorded 21 days after birth. The weight of each  
435 mouse was normalized for the average weight of the litter and plotted according to their  
436 genotype. T-tests were performed for statistical significance; “ns”: not significant, “\*\*\*\*”: p<  
437 0.0002. **C)** Representative 8.0 μm histological H&E staining sections of ovaries from  
438 *CcnB2*<sup>+/+</sup> and *CcnB2*<sup>-/-</sup> mice.

439 **Fig. 3. Aberrant timing of meiotic resumption in oocyte depleted of CCNB2 is due**  
440 **to defective pre-MPF**

441 **A)** Western blot analysis of extracts from 150 oocytes from *CcnB2*<sup>+/+</sup>, +/-, and -/- mice. **B)**  
442 Kinase assays were performed using increasing numbers of oocytes from *CcnB2*<sup>+/+</sup> (+/+) or  
443 *CcnB2*<sup>-/-</sup> (-/-) mice and a GST-pp1 fragment as a substrate. Levels of T320 PP1

444 phosphorylation were detected using a specific antibody (pT320-pp1). The level of total  
445 substrate loaded was evaluated by Ponceau S staining (Total-pp1). **C)** Quantification of  
446 six independent kinase assays. pT320-pp1/Total-pp1 ratios from *CcnB2*<sup>-/-</sup> oocytes were  
447 expressed as fold changes over their matched *CcnB2*<sup>+/+</sup> controls. A t-test was performed  
448 to determine statistical significance; “\*\*\*\*”: p= 0.0007. **D)** Time of GVBD was determined  
449 through brightfield images acquired every 15 mins for 24 hrs. Results from four  
450 independent experiments are included. Median times of GVBD with interquartile range  
451 are reported (mean GVBD time: *CcnB2*<sup>+/+</sup>= (1.35 ± 0.06 hrs), *CcnB2*<sup>+/-</sup>= (1.76 ± 0.10 hrs),  
452 *CcnB2*<sup>-/-</sup>= (4.41 ± 0.24 hrs). A non-parametric Mann-Whitney test was performed to  
453 evaluate statistical significance; “\*\*\*\*”: p< 0.0001. **E)** Oocytes were injected with mRNA  
454 encoding *CcnB1-mCherry* and, after 3h incubation, were released in Cilostamide-free  
455 medium. GVBD time and statistical significance were determined as in **D)**; “ns”: not  
456 significant.

457 **Fig. 4. Although CDC25 translocation to the nucleus is unaffected, WEE1B export**  
458 **from the nucleus is delayed in *CcnB2*<sup>-/-</sup> oocytes**

459 Oocytes were injected with inactive *Cdc25B-YFP* (**A**) or *Wee1B-YFP* (**B**) and, after  
460 overnight incubation, were released in Cilostamide-free medium. Brightfield and YFP  
461 images were acquired every 5 mins for 20 hrs. Oocytes from *CcnB2*<sup>-/-</sup> mice were divided  
462 into two groups according to their GVBD time; 0-4 hrs: “early GVBD” and ≥4 hrs: “late  
463 GVBD.” **A-B)** Representative pictures of an oocyte from *CcnB2*<sup>+/+</sup>, *CcnB2*<sup>-/-</sup> (early GVBD),  
464 and *CcnB2*<sup>-/-</sup> (late GVBD) are reported. The red box marks the time of GVBD. **C)** Rates  
465 of CDC25-YFP or **(D)** WEE1B-YFP translocation were calculated from each single oocyte  
466 as the slope of the linear regression of the Nuclear/Cytoplasmic ratios. Rates were  
467 expressed as medians with interquartile range. T-tests were performed to assess  
468 statistical significance; “ns”: not significant. “\*\*\*\*”: p< 0.0001

469 **Fig. 5. MI spindle formation and activation of *CcnB1* and *Mos* translation are**  
470 **disrupted in *CcnB2*<sup>-/-</sup> out mice**

471 **A-B)** Oocytes were injected with a 1:1 mix of *mCherry*-polyadenylated and either *YFP-*  
472 *CcnB1*-long 3’UTR (**A**) or *YFP-Mos* 3’UTR (**B**). After overnight incubation, oocytes were  
473 release in Cilostamide-free medium, and brightfield, YFP, and mCherry images were  
474 acquired every 15 mins for 25 hrs. YFP signals were normalized by plateaued mCherry



475 signals (YFP/mCherry). The normalized rate of YFP accumulation was calculated before  
476 (0-2 hrs) and after (4-6 hrs) GVBD for each single oocyte. Rates were plotted as the  
477 median (red) and interquartile range. T-tests were used to evaluate statistical  
478 significance; “\*\*\*”:  $p = 0.0058$ , “\*\*\*\*”:  $p < 0.0001$ . **C)** Oocytes were released in Cilostamide-  
479 free medium and fixed 8 hrs after meiotic resumption. The spindle and the chromatin were  
480 visualized with  $\beta$ -tubulin 488 antibody, and DAPI, respectively. Representative pictures  
481 are shown for oocytes arrested in prophase I, GVBD without a spindle, early spindle, and  
482 bipolar MI spindle. Oocytes were scored for maturation stage and plotted as percentage  
483 of oocytes at each stage. Number of oocytes in each group is reported.

484 **Fig. 6. A population of *CcnB2*<sup>-/-</sup> oocytes fails to complete meiosis I because of**  
485 **altered APC activation**

486 Oocytes were released in Cilostamide-free medium and brightfield images were captured  
487 every 15 mins. **A)** The cumulative times of PBE were plotted and t-tests between *Ccnb2*<sup>+/+</sup>  
488 and *CcnB2*<sup>-/-</sup> oocytes performed (red asterisks); “\*”:  $p < 0.05$ , “\*\*\*”:  $p < 0.01$ . **B-C)** Oocytes  
489 were released in Cilostamide-free medium and were fixed after 24 hrs. The spindle and  
490 the chromatin were visualized with  $\beta$ -tubulin 488 antibody, and DAPI, respectively. **B)**  
491 Representative pictures are shown for oocytes arrested in prophase I, MI, telophase I,  
492 and MII. **C)** Oocytes were scored for maturation stage (reported in panel B) and plotted  
493 as percentage of oocytes at each stage. **D)** Oocytes were injected with mRNA encoding  
494 the APC substrate *Securin-YFP* and, after 17 hrs incubation, released in Cilostamide-free  
495 medium. Securin-YFP level was measured every 15 mins. **E)** Oocytes were injected with  
496 mRNA encoding for *CcnB1-mCherry* and, after 3 hrs incubation, released in Cilostamide-  
497 free medium. CCNB1-YFP levels were measured every 15 mins.

498

499 **Fig. 7. A population of *CcnB2*<sup>-/-</sup> oocytes arrests in MI because of persistent SAC**  
500 **activity**

501 **A-B)** Oocytes were released in Cilostamide-free medium and fixed at indicated times.  
502 Where specified, oocytes were treated with Nocodazole 15 mins before fixation. MAD2,  
503 CREST, and chromatin were visualized with specific antibodies and DAPI, respectively.  
504 **A)** Representative pictures are shown for each condition. **B)** The amount of MAD2  
505 localized at each single kinetochore was quantified by measuring the ratio between MAD2

506 and CREST. Number of kinetochore analyzed is reported below each scatter plot. T-tests  
507 were used to evaluate statistical significance; ns: “not significant,” “\*\*\*”:  $p < 0.0001$ . **G)**  
508 Oocytes were released in the absence or presence of 100 nM Reversine. Time of GVBD  
509 and PBE was determined through brightfield images acquired every 15 mins for 24 hrs.  
510 The length of meiosis I was calculated as the time between GVBD and PBE.

511

## 512 **Materials and methods**

### 513 **Mice, oocyte collection, and microinjection**

514 All experimental procedures involving mouse were approved by the Institutional  
515 Animal Care and Use Committee of UCSF (Protocol: AN101432). C57BL/6 female mice  
516 (21-24 days) were primed with 5 units of PMSG and were sacrificed 44-48 hours later to  
517 collect GV-arrested oocytes. For collection of MII-arrested oocytes, females were primed  
518 with 5 units of PMS, after 48 hrs, injected with hCG, and after 13 hrs, sacrificed for egg  
519 retrieval. Cumulus-enclosed oocytes from antral follicles were isolated, and mechanically  
520 denuded in HEPES modified Minimum Essential Medium Eagle (Sigma-Aldrich, M2645)  
521 supplemented with 1 $\mu$ M Cilostamide (Calbiochem, 231085). When specified, oocytes  
522 were microinjected with 5-10 pl of mRNA. Oocytes were then cultured at 37°C with 5%  
523 CO<sub>2</sub> in MEM- $\alpha$  medium (Gibco, 12561-056) supplemented with 0.2 mM sodium pyruvate,  
524 75  $\mu$ g/ml penicillin, 10  $\mu$ g/ml streptomycin, 3 mg/ml bovine serum albumin (BSA), and 1  
525  $\mu$ M Cilostamide for 3 hrs or 16 hrs as indicated in the figure legends.

### 526 **Plasmid construct and mRNA preparation**

527 (C483S)-CDC25B and (K237A)-WEE1B coding sequence were cloned upstream  
528 of the YPet coding sequence. The CCNB1 and CCNB2 open reading frame sequences  
529 were obtained by sequencing oocyte cDNA and cloned upstream of the mCherry coding  
530 sequence. The *CcnB1*, *CcnB2*, and *Mos* 3'UTR sequences were also obtained in the  
531 same manner and cloned downstream of the YPet coding sequence. All constructs were  
532 prepared in the pCDNA 3.1 vector containing a T7 promoter and fidelity was confirmed  
533 by DNA sequencing. mRNA of all the reporters were *in vitro* transcribed with mMACHINE  
534 mMACHINE T7 Transcription Kit (Ambion, AM1344); when specified, polyadenylation  
535 was achieved using Poly(A) Tailing Kit (Ambion, AM1350). All the messages were purified  
536 using MEGAclean Kit (Ambion, AM1908). mRNA concentrations were measured by  
537 NanoDrop and message integrity was evaluated by electrophoresis.

### 538 **Time-lapse microscopy, analysis of protein translocation, and YFP-3'UTR** 539 **translation**

540 Time-lapse experiments were performed using a Nikon Eclipse T2000-E equipped  
541 with mobile stage and environmental chamber to 37°C and 5% CO<sub>2</sub>. Filter set: dichroic  
542 mirror YFP/CFP/mCherry 69008BS; for Ypet channel (Ex: S500/20x 49057 Em:

543 D535/30m 47281), mCherry channel (Ex: 580/25x 49829 Em: 632/60m). (C483S)-  
544 CDC25B-YFP, (K237A)-WEE1B-YFP, securin-YFP, or CCNB1-mCherry were injected at  
545 300 ng/ $\mu$ L. After injection, oocytes were incubated for 16 hrs to allow expression of the  
546 probes. Ratios of nuclear and total probe were calculated after subtraction of the  
547 background. Rate of translocation were calculated as the slope of the line obtained by  
548 linear regression. *YFP-3'UTR* reporters we co-injected with polyadenylated *mCherry* at  
549 12.5  $\mu$ g/ $\mu$ L each. After injection, oocytes were incubated for 16 hrs to allow expression of  
550 the probes. YFP signals were normalized by the plateaued level of mCherry signal to  
551 control of amount of injection. Rates were calculated with YFP/mCherry ratios as the  
552 slope of the curve obtained by linear regression of the time points indicated.

### 553 **RiboTag-Immunoprecipitation and RNASeq**

554 Oocytes were collected in minimal volumes (5-10  $\mu$ l) in 0.1% polyvinylpyrrolidone  
555 (PVP) in DPBS, flash frozen in liquid nitrogen, and stored at -80°C. Samples were thawed,  
556 randomly pooled to yield a total of 200 oocytes per time point per replicate, and 300  $\mu$ l  
557 supplemented homogenization buffer (sHB) was added to each pooled sample. The  
558 homogenates were then vortexed for 30 secs, flash frozen in liquid nitrogen, and allowed  
559 to thaw at room temperature (RT); this was repeated twice. Finally, the homogenates  
560 were centrifuged for 10 mins at maximum speed at 4°C and the supernatant (IP soup)  
561 was collected in new tubes. Meanwhile, the appropriate volume (50  $\mu$ l per sample) of  
562 Dynabeads™ Protein G (Invitrogen) was washed three times in 500  $\mu$ l homogenization  
563 buffer (HB) on a rotor at 4°C for 5 mins per wash. An additional two washes were  
564 performed with 500  $\mu$ l sHB on a rotor at 4°C for 10 mins per wash. The final wash solution  
565 was removed and the beads were eluted in the original volume of sHB and kept on ice.  
566 20  $\mu$ l cleaned beads was added to each IP soup to pre-clear on a rotor at 4°C for 1 hr.  
567 The beads were removed via a magnetic rack and 15  $\mu$ l of IP soup was collected from  
568 each sample in 200  $\mu$ l of RLT buffer (Qiagen) to serve as the input samples. Input samples  
569 were frozen and kept at -80°C until RNA extraction. 3  $\mu$ l (3  $\mu$ g) anti-HA.11 epitope tag  
570 antibody (901501, BioLegend) was added to each of the remaining IP soups and all  
571 samples were incubated on a rotor at 4°C for 4 hrs. 30  $\mu$ l clean beads were then added  
572 to the samples and incubated overnight on a rotor at 4°C. The beads (now bound by HA-  
573 tagged ribosomes and the associated mRNAs) were washed five times in 1 ml of wash

574 buffer with 1 M urea (uWB) on a rotor at 4°C for 10 mins per wash. The final uWB wash  
575 was removed and 250 µl RLT buffer was added to each sample and vortexed for 30 secs.  
576 RNA extraction was performed following the Rneasy Plus Micro Kit protocol (Qiagen).  
577 Samples were eluted in 10 µl of RNase-free water. RNA samples were sent to the  
578 Gladstone Institutes Genomics Core for quality control using Bioanalyzer (Agilent) and  
579 cDNA library preparation with the Ovation RNA-Seq System V2 (NuGen). Samples were  
580 sequenced using the HiSeq400 platform.

### 581 **Western blot**

582 Oocytes were collected in 0.1% PVP in DPBS and then boiled for 5 min at 95°C in  
583 1x Laemmli Sample Buffer (Bio-Rad) supplemented with with β-mercaptoethanol. Lysates  
584 were resolved in 10% Laemmli gels and transferred onto Supported Nitrocellulose  
585 Membranes. Membranes were incubated in the primary antibody overnight at 4°C;  
586 Antibodies and dilutions used: CCNB2, 1:1,000 (R&D Systems, AF6004); CCNB1, 1:500  
587 (Abcam, ab72); β-actin, 1:1,000 (Abcam, ab8227); CDK1, 1:1,000 (Santa Cruz); CPEB1,  
588 1:1,000 (Abcam, ab73287); T320-pp1, 1:30,000 (Abcam, ab62334); GST, 1:10,000  
589 (Sigma).

### 590 **Immunofluorescence**

591 Oocytes were fixed in DPBS supplemented with 0.1% Triton X-100 and 2%  
592 formaldehyde (Sigma, 28908) for 30 mins. After three 10 min washes with blocking buffer,  
593 the oocytes were incubated overnight in blocking buffer (1x PBS, 0.3% BSA, 0.01%  
594 Tween), then permeabilized for 15 mins in DPBS supplemented with 0.3% BSA and 0.1%  
595 Triton X-100. After three 10 min washes with blocking buffer, oocytes were incubated for  
596 one hr in primary antibody diluted in blocking buffer. The antibodies used: β-tubulin-488,  
597 1:100 (Cell Signaling Technology, 3623); CREST, 1:200 (ImmunoVision); MAD2, 1:200  
598 (Dr. Rey-Huei Chen, Academia Sinica, Taipei). After three 10 min washes with blocking  
599 biffer, the membrane was incubated for one hr with the appropriate secondary antibody,  
600 1:500 (Alexa-568 goat anti-human; Alexa-488 goat anti-rabbit). Oocytes were washed  
601 again for 10 mins, three times in blocking bugger and mounted with VECTASHIELD  
602 Mounting Medium with DAPI (Vector, H-1200). Pictures were acquired with a confocal  
603 Nikon C1SI equipped with X60 oil immersion lens.

### 604 ***In vitro* CDK1 kinase assay**

605 Oocytes were collected in 30  $\mu$ l of 2X kinase buffer (100 mM Hepes, 30 mM MgCl<sub>2</sub>,  
606 2 mM EGTA, 10 mM CaCl<sub>2</sub>, 2 mM DTT, 2  $\mu$ g/ml Leupeptin, 2  $\mu$ g/ml Aprotinin, 2  $\mu$ M  
607 Okadaic Acid). Oocytes were lysed by freezing and thawing in liquid nitrogen two times.  
608 Extracts were incubated at 30°C for 15 mins in presence of 0.1 mM ATP, 10 mM DTT, 2  
609  $\mu$ M Okadaic acid, and 2  $\mu$ g of recombinant peptide PP1-GST as the substrate. PP1-GST  
610 was produced as previously described (Daldello et al., 2015). Reactions were stopped by  
611 adding Laemmli Sample Buffer and boiling at 95°C for 5 mins. CDK1 activity was  
612 measured by quantifying the Western blot signal of phosphorylated T320 of the PP1-GST  
613 substrate.

#### 614 **Data processing, quantification, and statistical analysis**

615 Visual quality checks of RNASeq reads were performed using FastQC and reads  
616 were then trimmed with Trimmomatic. Alignment of the reads to the mouse genome was  
617 performed by Hisat2, .bam files were sorted and indexed using Samtools, and count files  
618 were generated by HTSeq. TMM normalization and the remaining RNASeq statistical  
619 analyses were done through edgeR. MAD2/CREST signals were quantified with Fiji. T-  
620 tests and non-parametric Mann-Whitney tests were performed using the GraphPad Prism  
621 7.

622

#### 623 **Supplementary methods**

##### 624 **FRET experiment**

625 The CDK1 FRET sensor (2327) was a gift from Dr. Jonathon Pines (Addgene,  
626 26064). Oocytes were injected with 5-10 pl of FRET sensor mRNA at 300 ng/ $\mu$ l, and, after  
627 16hrs incubation, fluorescence level was quantified as described in the methods section.  
628 Intensity signals of YFP/YFP, CFP/CFP and CFP/YFP channels were subtracted by the  
629 background. The CFP/YFP channel was corrected for the YFP bleed-through and FRET  
630 was calculated as (CFP/YFP)/(CFP/CFP).

631

632 **Fig. S1**

633 **A)** Pups from  $+/-\sigma \times +/-\text{♀}$  matings were genotyped and classified according to their  
634 genotype. Thirty-two litters from 12 mating couple were analyzed. **B)** Number of pups per  
635 litter was recorded. The number of litters analyzed is displayed. T-tests were performed  
636 to evaluate the statistical significance; “ns”: not significant, “\*\*\*”:  $p= 0.0014$ . **C)** The  
637 frequency of parturition was measured for different mating schemes and expressed as  
638 number of litters per month per female. T-tests were performed; “ns”: not significant, “\*\*\*”:  
639  $p= 0.0022$ . **D)** Age at the first litter for different mating schemes. Breeding was initiated  
640 when animals reached four weeks of age. **E)** Number of oocytes retrieved from the  
641 ampullae per ovary after PMSG and hCG treatment. **F)** Diameter of the oocytes was  
642 measured by inspecting brightfield recordings.

643 **Fig. S2**

644 **A)** Western blot analysis of 150 oocytes from *CcnB2*<sup>+/+</sup> and <sup>-/-</sup> mice. **B)** Oocytes were  
645 injected with a probe specific for CDK1. After 18 hrs, four frames were recorded in  
646 brightfield, YFP/YFP, CFP/CFP, and CFP/YFP. FRET is expressed as  
647  $(\text{CFP/YFP})/(\text{CFP/CFP})$ ; “\*\*\*”:  $p= 0.001$ . **C)** Time of GVBD from Fig. 3 B was replotted as  
648 a histogram to highlight the presence of two different populations in the *CcnB2*<sup>-/-</sup> oocytes.  
649 **D)** The level of FRET in GV-arrested oocytes was correlated the GVBD time of each  
650 oocyte. The Pearson coefficient ( $p= -0.55$ ) has been calculated with its associated p-  
651 value; “\*\*\*”:  $p= 0.0013$ . **E)** The diameter of *CcnB2*<sup>-/-</sup> oocytes was correlated to GVBD time;  
652 “ns”: not significant. **F)** Level of expression of mCherry-CcnB1 in each oocyte was  
653 correlated with GVBD time. Pearson coefficient ( $p=-0.53$ ) has been calculated with its  
654 associated p value; “\*\*\*”:  $p= 0.0049$ . **D-F)** The best-fit line is displayed in red and the 95  
655 percent interval of confidence is represented as dashed lines.

656 **Fig. S3**

657 **A)** GVBD time of oocytes from Fig. 4, A and C was determined by the inspection of the  
658 brightfield recordings. **B)** The average of the nuclear/cytoplasmic ratios of CDC25B-YFP  
659 signals that was used to calculate the rates Fig. 4, A and C. are plotted. **C)** The maximum  
660 nuclear/cytoplasmic ratio of CDC25B-YFP localization of each oocyte was correlated to  
661 the oocyte GVBD time. The best-fit line is displayed in red and the 95 percent interval of  
662 confidence is represented as dashed lines. The Pearson coefficient ( $p= 0.63$ ) was



663 calculated with its associated p-value; “\*\*\*”: p= 0.0016. **D)** The level of the CDC25B-YFP  
664 at the start of recording from Fig. 4, A and C was quantified. **E)** GVBD time of oocytes  
665 from Fig. 4, B and D was determined by inspection of brightfield recordings. **F)** The rate  
666 of WEE1B-YFP translocation of oocytes from Fig. 4, B and D was correlated to GVBD  
667 time of the oocytes. The best-fit line is displayed in red and the 95 percent interval of  
668 confidence is represented as dashed lines. The Pearson coefficient (p= 0.63) has been  
669 calculated with its associated p-value; “\*\*\*”: p= 0.0016. **G)** *Ccnb2*<sup>+/+</sup>, <sup>+/-</sup>, and <sup>-/-</sup> oocytes  
670 were injected with a CDK1-FRET reporter and, after 16 hrs incubation, released in  
671 Cilostamide-free medium. YFP/YFP, CFP/CFP and CFP/YFP signals were recorded  
672 every 5 mins. Individual FRET time courses were fitted to a sigmoid equation  
673 
$$\frac{(FRET_{max} - FRET_{min})}{(1 + 10^{-(t-t_0)*Hillslope})}$$
 standardized on the individual GVBD  
674 times. Single oocyte time courses are shown as thin lines, while the average of the fitted  
675 curves are shown as bolded lines. **H)** Hillslopes from G) were plotted with the median and  
676 interquartile ranges. T-tests were used to evaluate statistical significance; “\*\*\*”: p= 0.0038,  
677 “\*\*\*\*”: p< 0.0001.

#### 678 **Fig. S4**

679 Complete single time courses of *YFP-CcnB1* 3’UTR (Long) (**A**) and *YFP-Mos* 3’UTR (**B**)  
680 used to calculate rates in Fig. 5, A and B, respectively.

#### 681 **Fig. S5**

682 **A)** Oocytes were retrieved after 13 hrs after hCG injection from the ampulla. Oocytes  
683 were scored based on the categories illustrated in Fig. 6 B. **B)** The rate of securin  
684 degradation was calculated for each oocyte and plotted as the median with the 25/75  
685 intervals of confidence. T-test were used to evaluate statistical significance; “\*\*\*\*”: p=  
686 0.0001. **C)** *Ccnb2*<sup>+/+</sup> and <sup>-/-</sup> oocytes were injected with a CDK1-FRET reporter and, after  
687 16 hrs incubation, released in Cilostamide-free medium. YFP/YFP, CFP/CFP, and  
688 CFP/YFP signals were recorded every 15 mins. The rate of change of FRET activity was  
689 calculated as the slope of FRET change with a window between 3-6 hrs after GVBD; “\*”:  
690 p= 0.0011. **D)** The rate of CCNB1 degradation was calculated for each oocyte and plotted  
691 as the median with the 25/75 intervals of confidence. T-test was used to evaluate  
692 statistical significance; “ns”: not significant.

**Fig. 1**

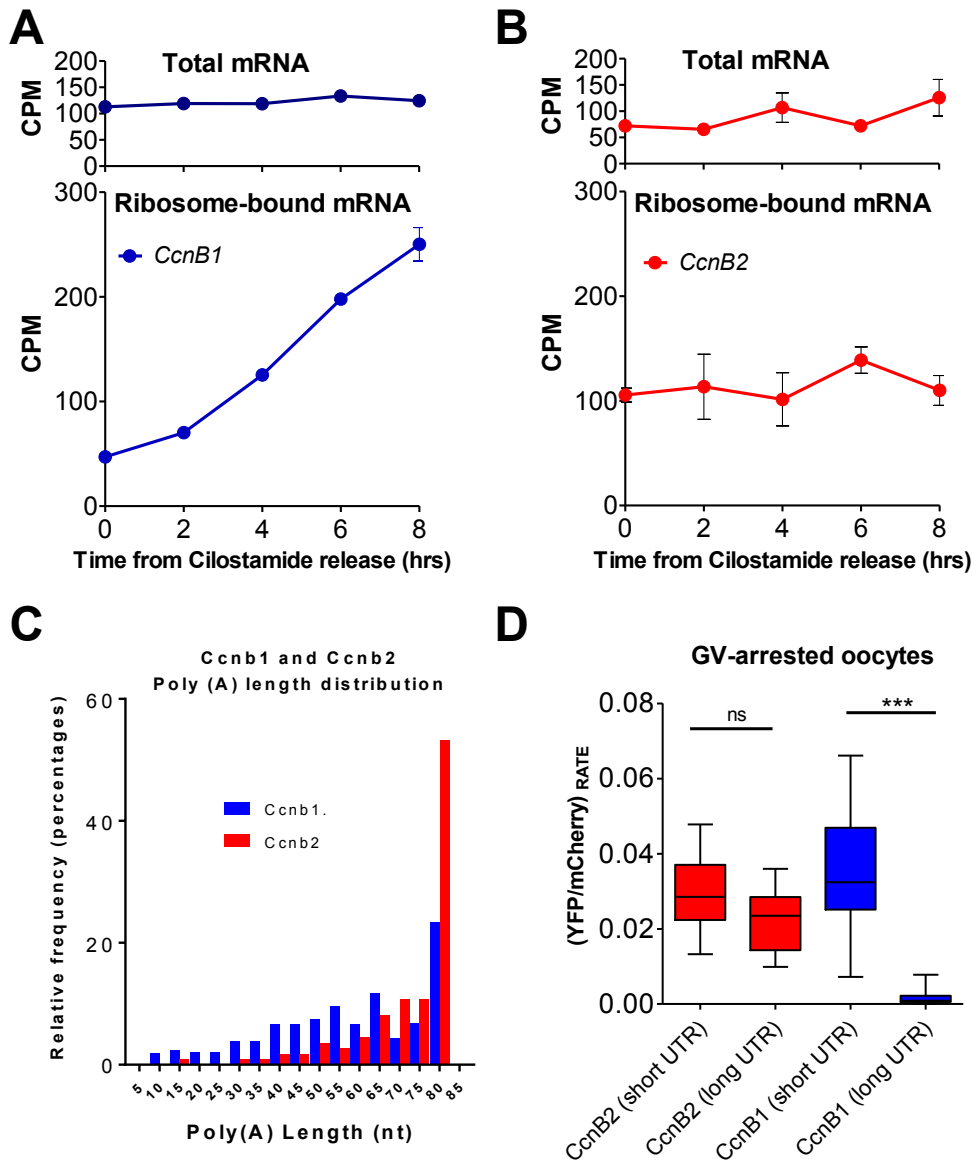

**Fig. 2**

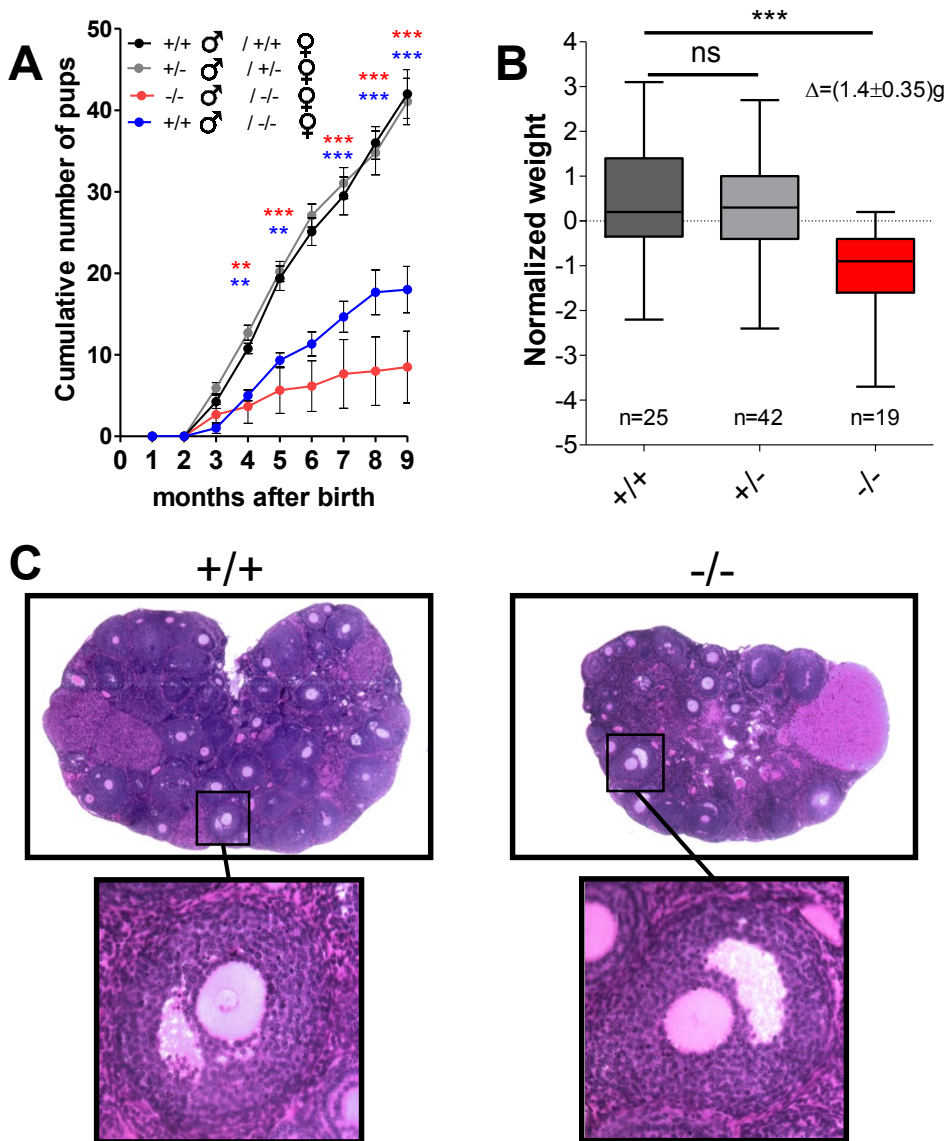

**Fig. 3**

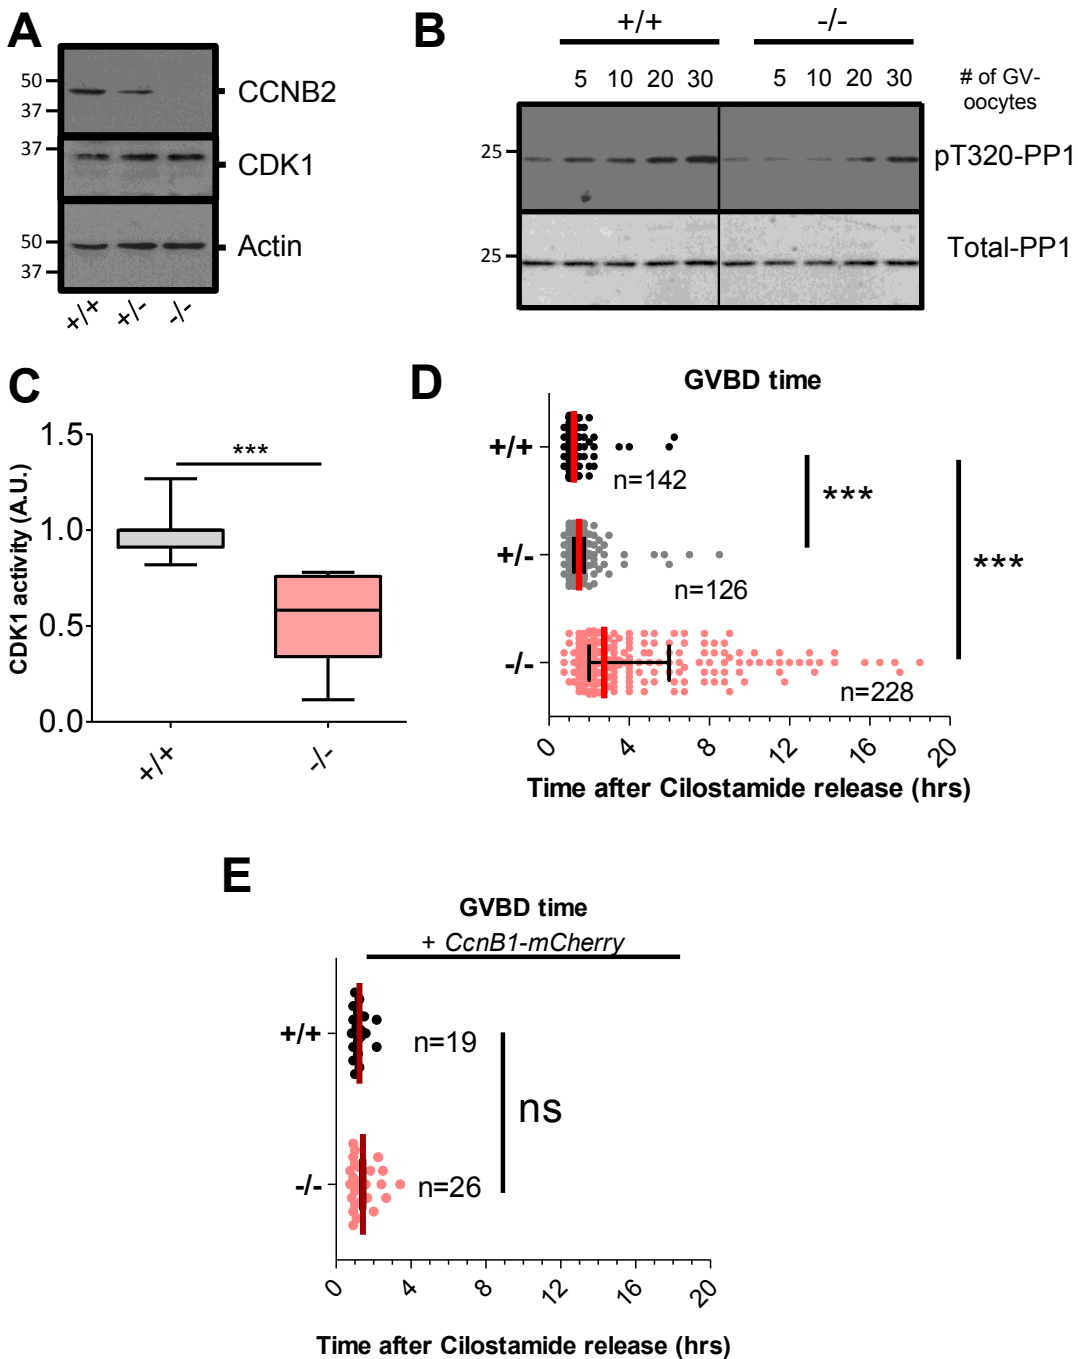

**Fig. 4**

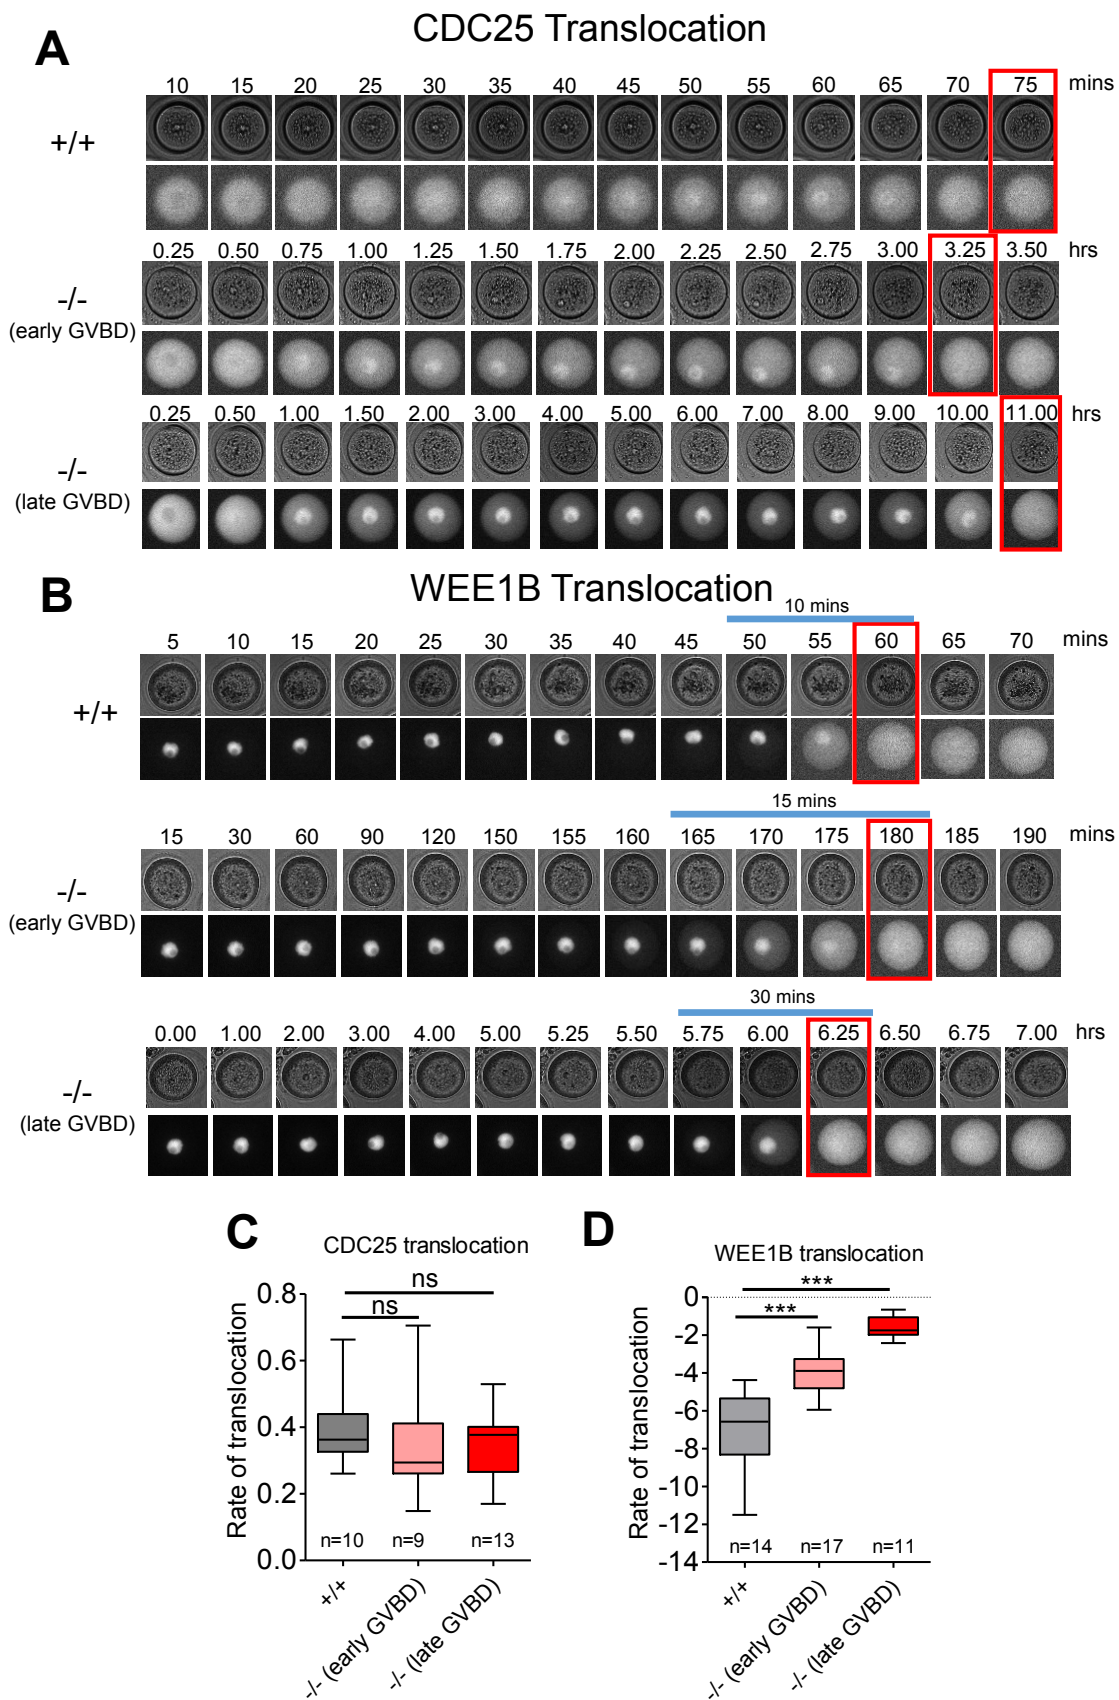

**Fig. 5**

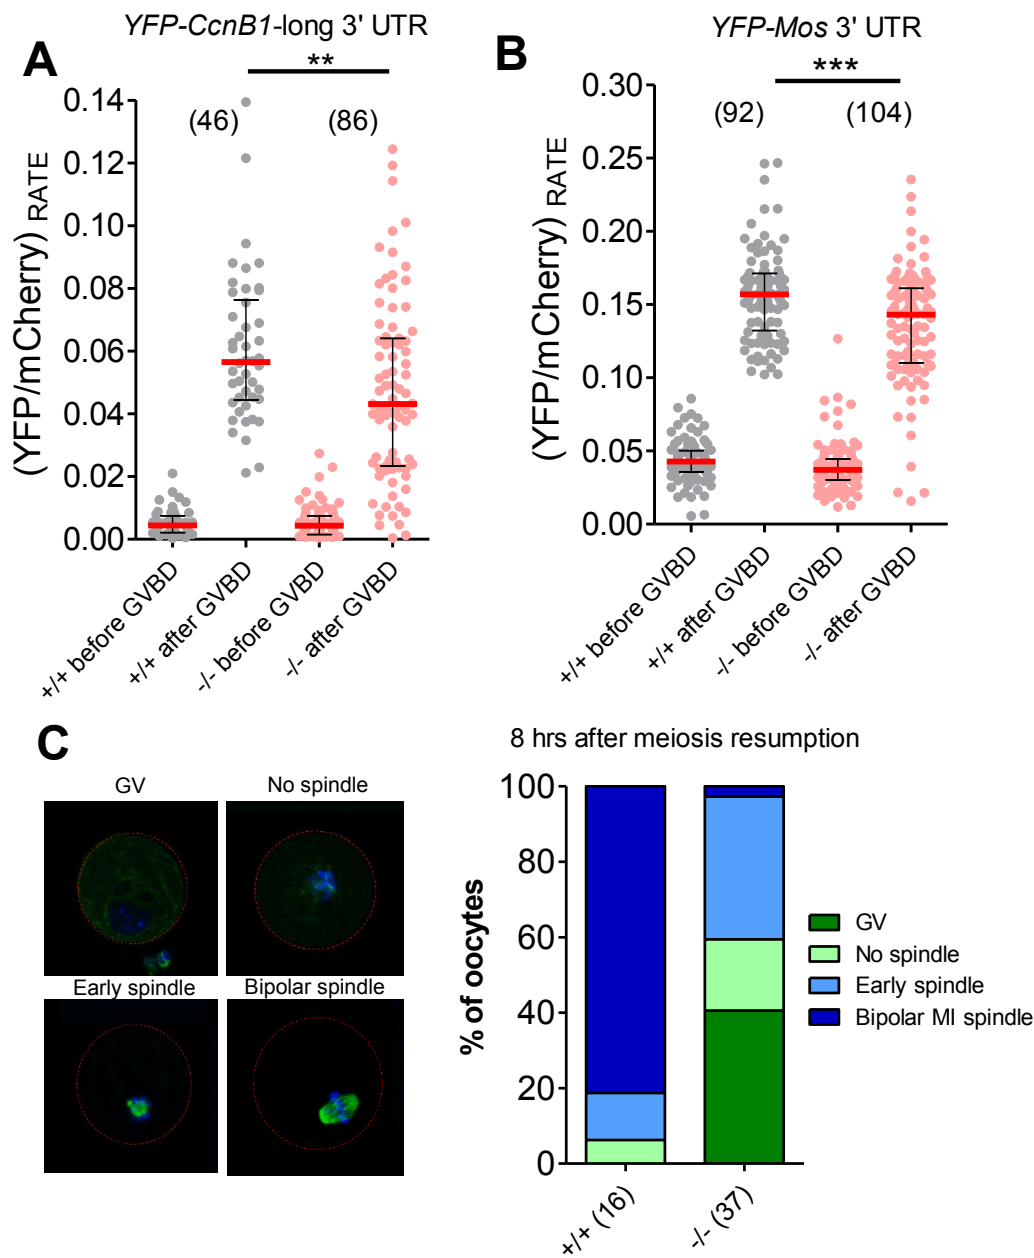

**Fig. 6**

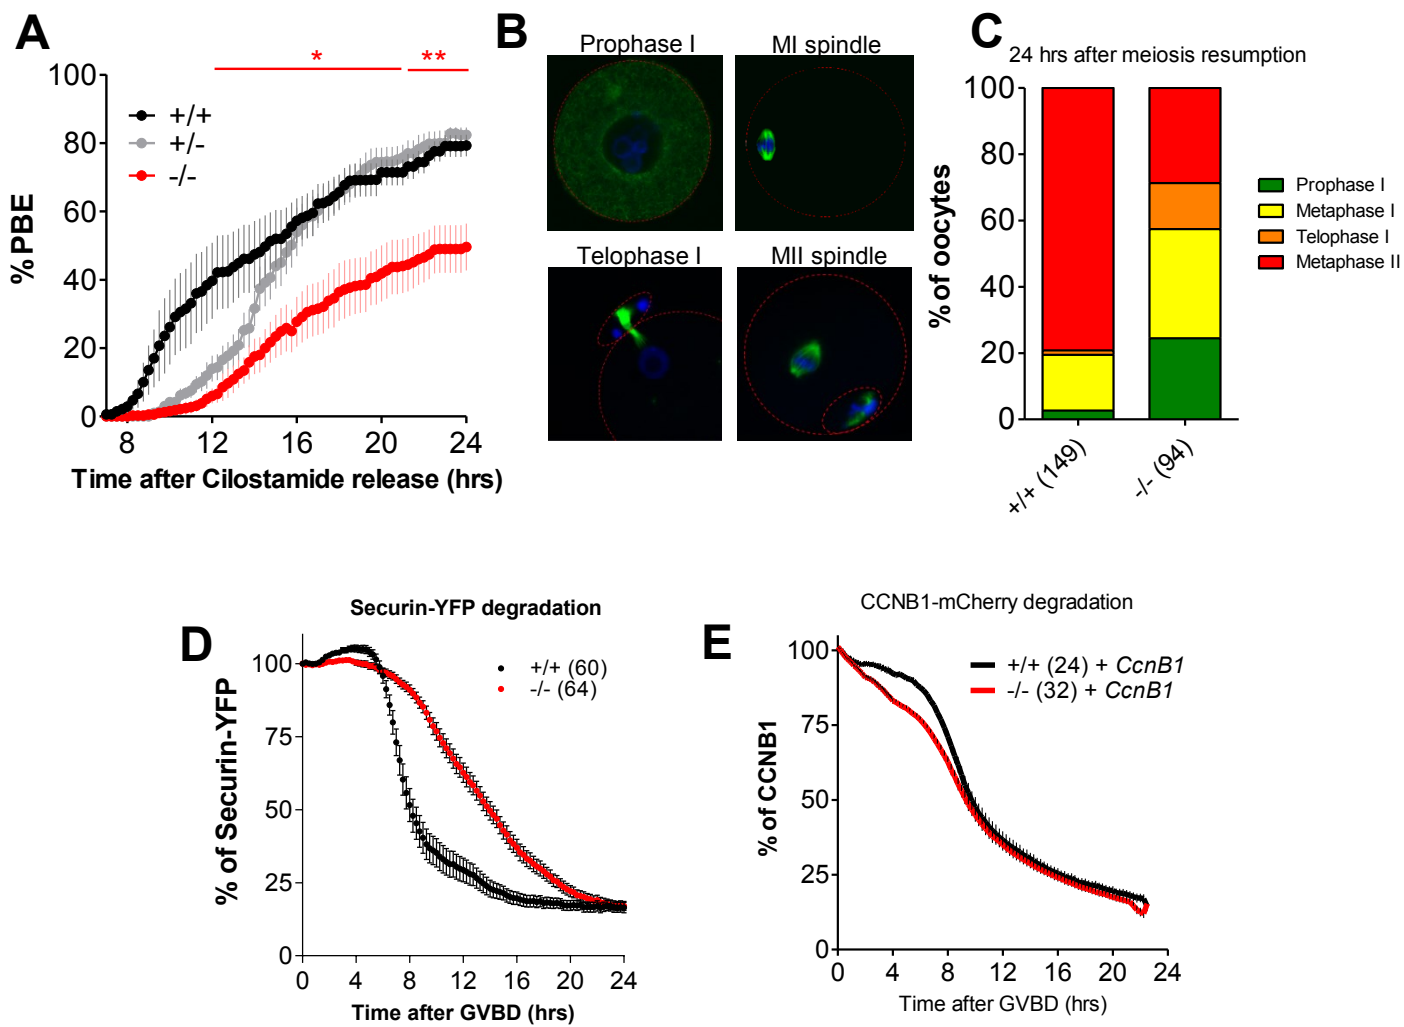



**Fig. 7**

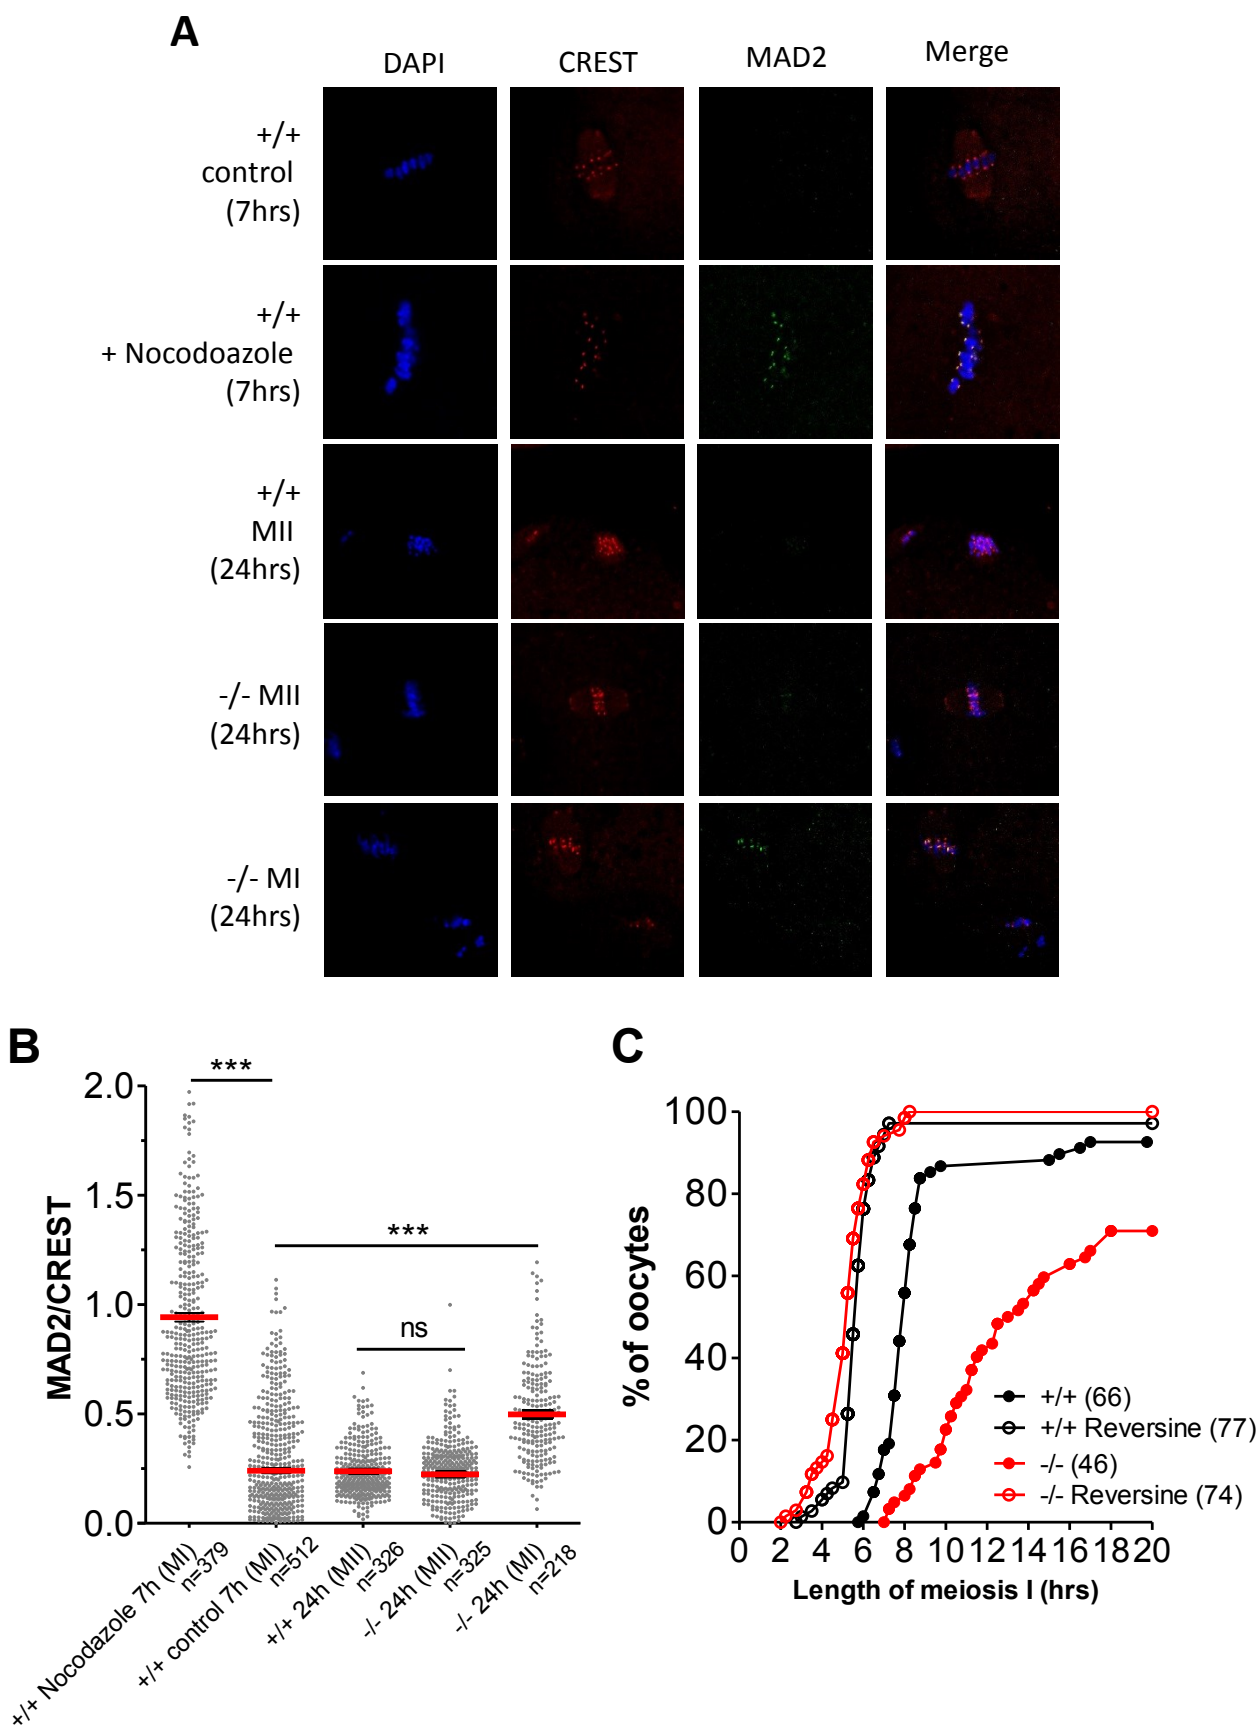

Supp. 1

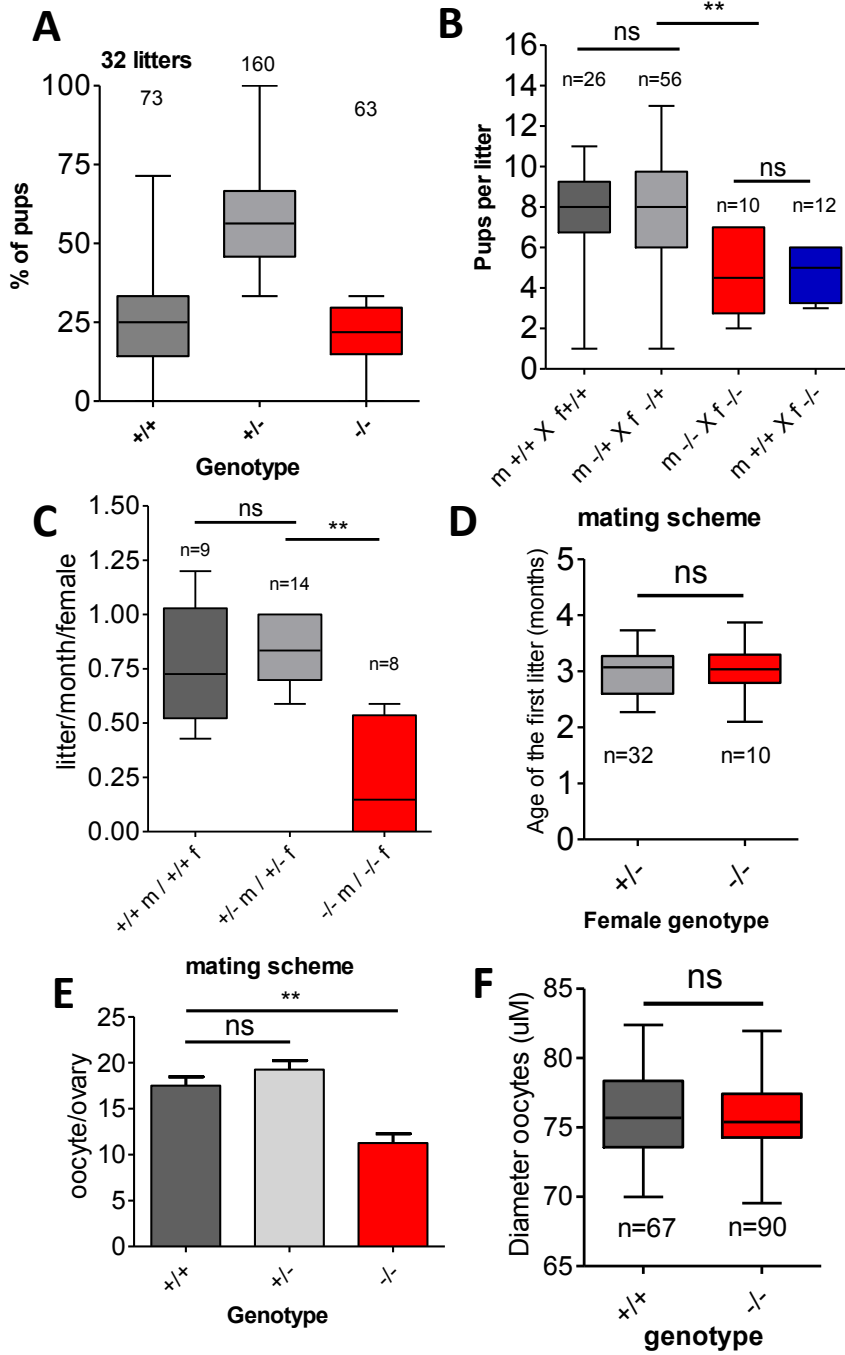

## Supp. 2

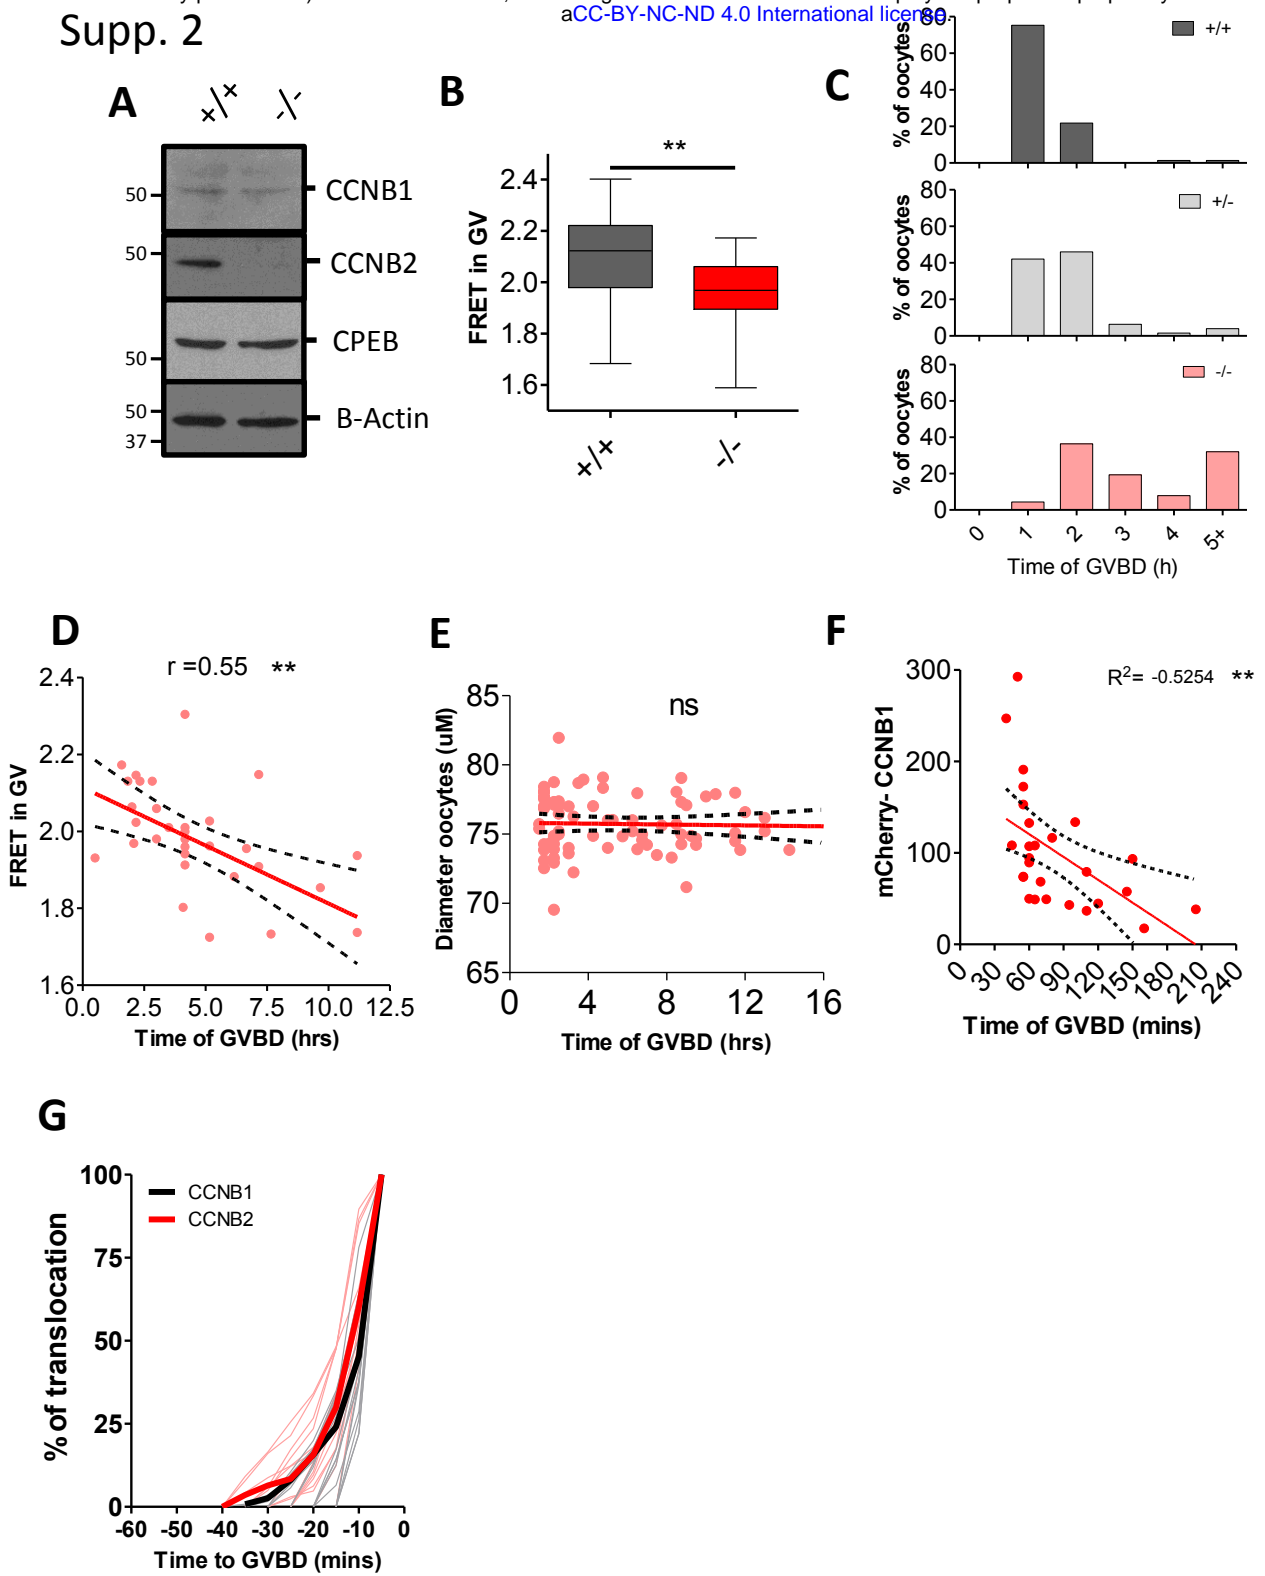

## Supp Fig. 3

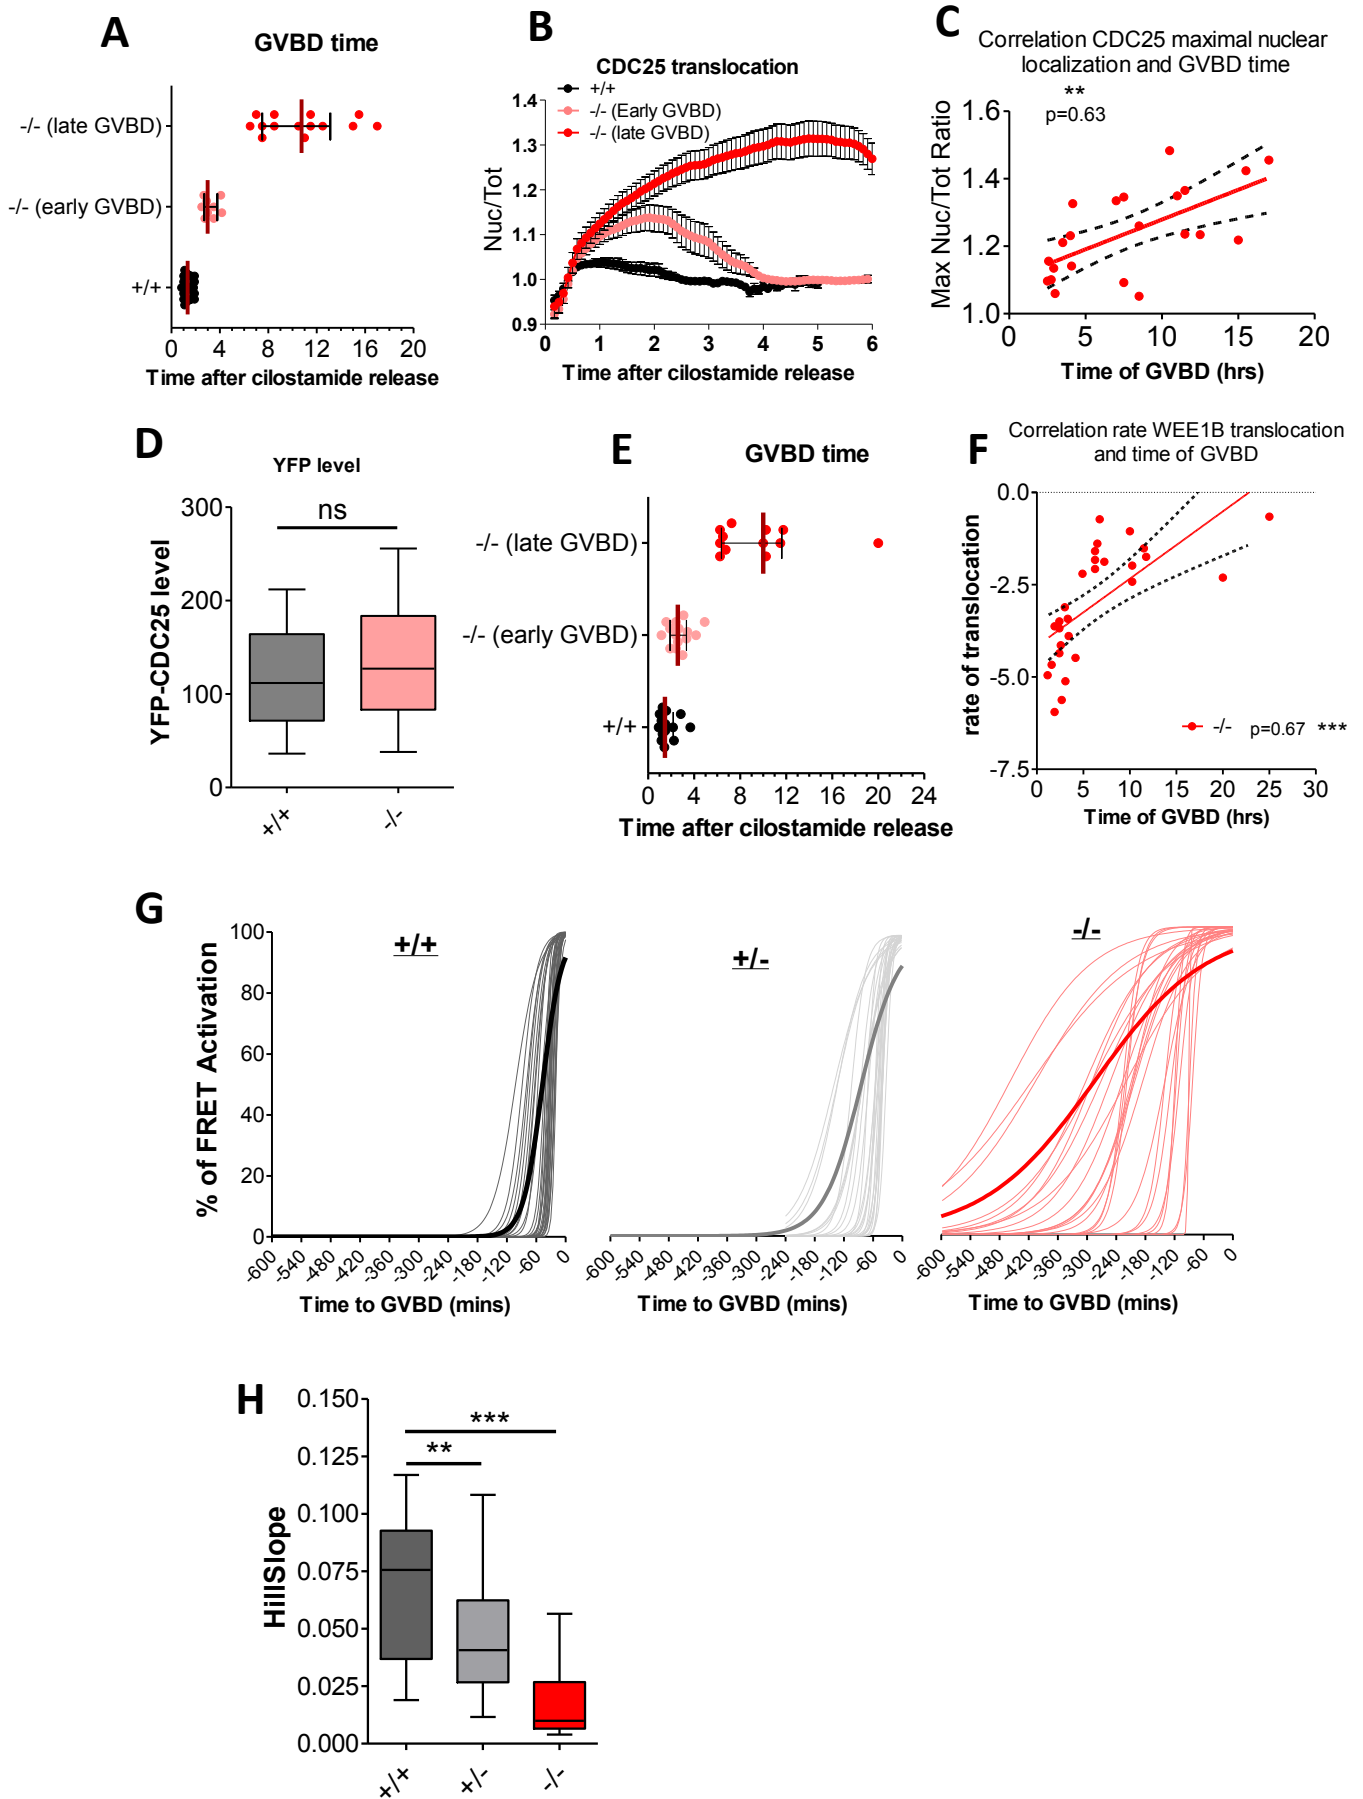

Supp fig. 4

**A**

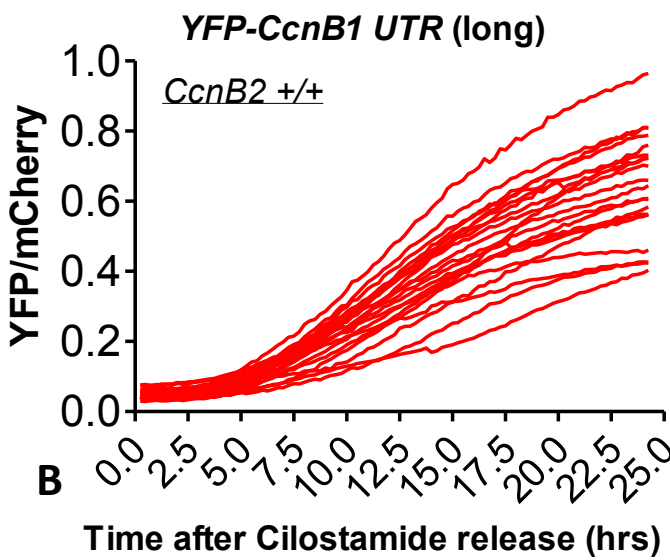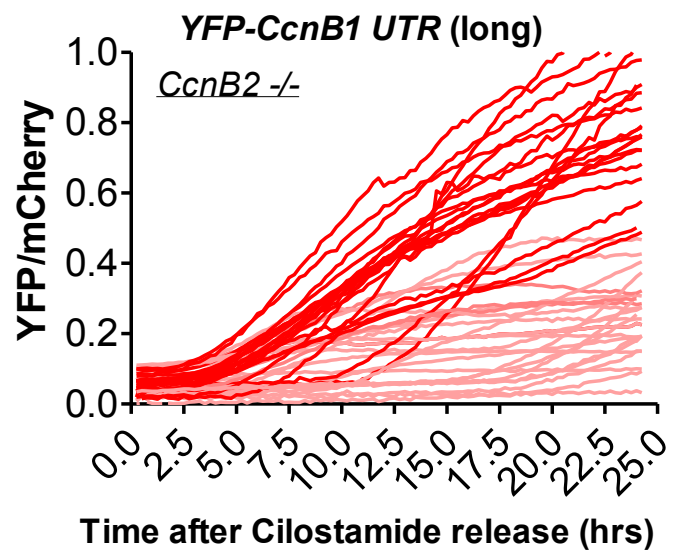

**B**

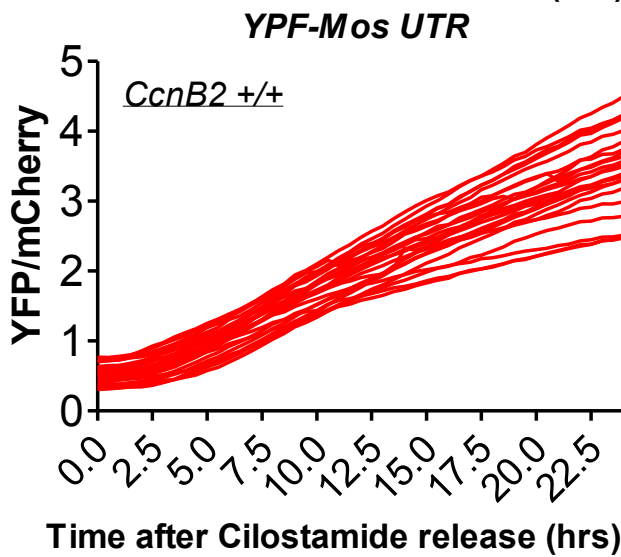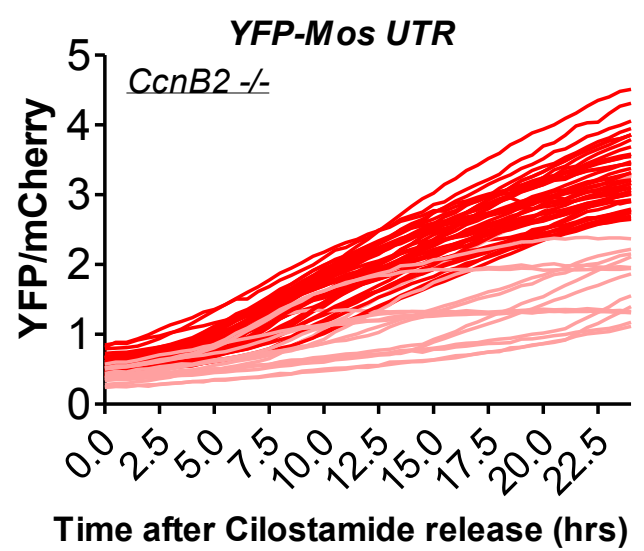

## Supp fig. 5

**A**

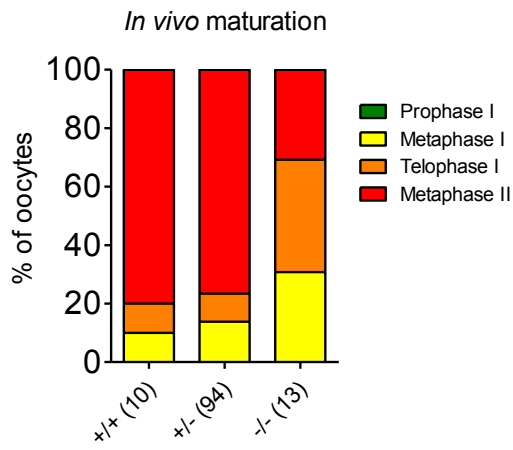

**B**

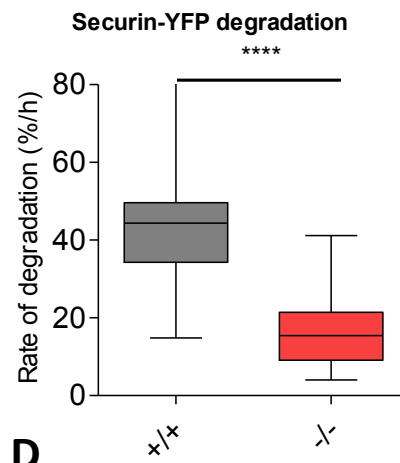

**C**

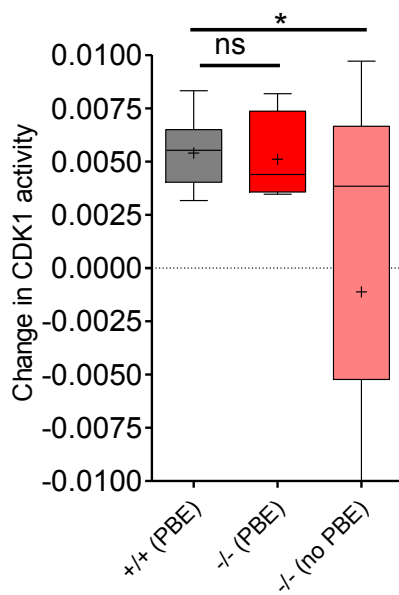

**D**

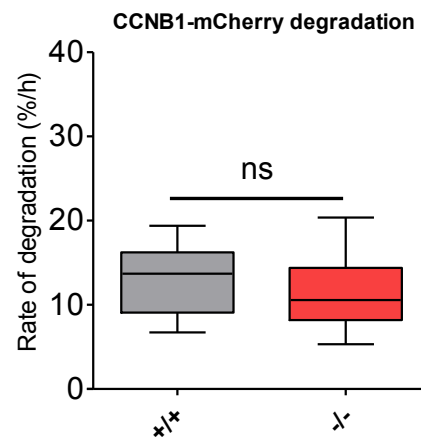

Source: https://www.biorxiv.org/content/10.1101/441352v1.full.pdf
